# Supplementary material for: High light-induced phosphorylation of Lhcb6 (CP24) enhances non-photochemical quenching dependent on the PSI-PSII megacomplexes
Source: Research Square preprint supplement (doi:10.21203/rs.3.rs-7613824/v1), 2025-10-29
Supplement: Supplementary file 1 [file 30c7a1e0bd0c0a1b46977605.xlsx]

## Sheet: Supplementary Table 2
Supplementary Table 2: PSII and PSI subunit-specific phosphorylated peptides
	Site AA	Up regulation (HL_mean / GL_mean > 1.2)	Down regulation (HL_mean / GL_mean < 0.8)	No significant variation	P value
CP29.1	T107	14.7919			0.0021
	T109	9.19673			0.0834
	T107	9.19673			0.0834
	S22	1.32998			0.3566
CP29.3	T114	6.20157			0.0385
	S35			0.986579	0.9466
CP24	T178	1.97753			0.0493
	T206			0.858477	0.0089
	S53		0.690358		0.1807
	S24		0.638649		0.0784
CP26	T52		0.520258		0.0035
	S54	1.21733			0.1109
	S57			0.943851	0.5045
D1	S268	3.62062			0.0003
CP43	T2	1.87406			0.1172
PsbS	T161	1.5133			0.0102
	T79	2.25899			0.0044
PsbO	S226	1.46422			0.1331
	S281		0.602849		0.0866
	S182		0.788694		0.2714
	S151		0.44958		0.0424
	S26	1.39004			0.0431
	T31	1.20526			0.2151
	S50			0.956268	0.8757
PsbE	S72		0.661338		0.037
LHCB1	S46			1.0062	0.9597
	S46			1.0062	0.9597
	S53			1.00124	0.9914
	S53			1.00124	0.9914
	S48			0.879022	0.3477
	S48			0.879022	0.3477
	S30	1.79002			0.0154
LHCB2	S40			1.19268	0.4048
	S44	1.56268			0.0551
	T37			0.894602	0.5961
	S27			1.17622	0.4277
PsaE	S61			1.15374	0.8193
PsaF	S95	0.798607			0.1476
PsaG	S119			0.916425	0.6609
	S117			0.916425	0.6609
PsaA	S6			1.07949	0.2524
	S22			0.899593	0.4339
PsaC	T74			0.891641	0.5249
	T73			0.882	0.5687
PsaD	S85			0.981967	0.984
	S85			0.981967	0.984
	S79	1.87534			0.0841
	S79	1.87534			0.0841
	S52		0.695205		0.3255
	S52		0.695205		0.3255
	S52			0.959656	0.8554
	S51			0.959656	0.8554
	S50			0.959656	0.8554
	S52			0.959656	0.8554
	S51			0.959656	0.8554
	S50			0.959656	0.8554
	S50		0.545413		0.132
	S50		0.545413		0.132
Lhca4	S163			0.85791	0.5241
	S44			0.865663	0.3762
