# Supplementary material for: High light-induced phosphorylation of Lhcb6 (CP24) enhances non-photochemical quenching dependent on the PSI-PSII megacomplexes
Source: Research Square preprint supplement (doi:10.21203/rs.3.rs-7613824/v1), 2025-10-29
Supplement: Supplementary file 1 [file d6186183c194d09b1b86d8f7.pdf]

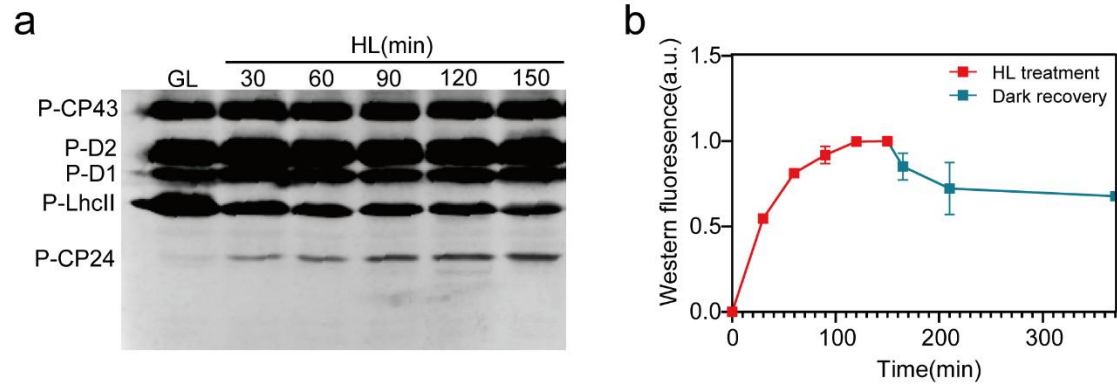

**Figure S1: Phosphorylation kinetics of phosphorylated CP24**

**a** Immunoblot of isolated thylakoid assayed with anti-P-Thr antibody. Before thylakoid isolation, leaves have been treated with HL ( $1,000 \mu\text{mol photons m}^{-2} \text{s}^{-1}$ ) for different periods. All lanes were loaded with  $3 \mu\text{g}$  Chl. The immunoblot depicts phosphorylation levels of key proteins including CP43, D2, D1, LhcII, and CP24 at different HL exposure times. **b** Densitometric analysis of immunoblot in (a). Symbols and error bars represent the mean  $\pm$  SD calculated from three independent biological replicates. Western fluorescence intensity is normalized relative to the initial value at time zero.

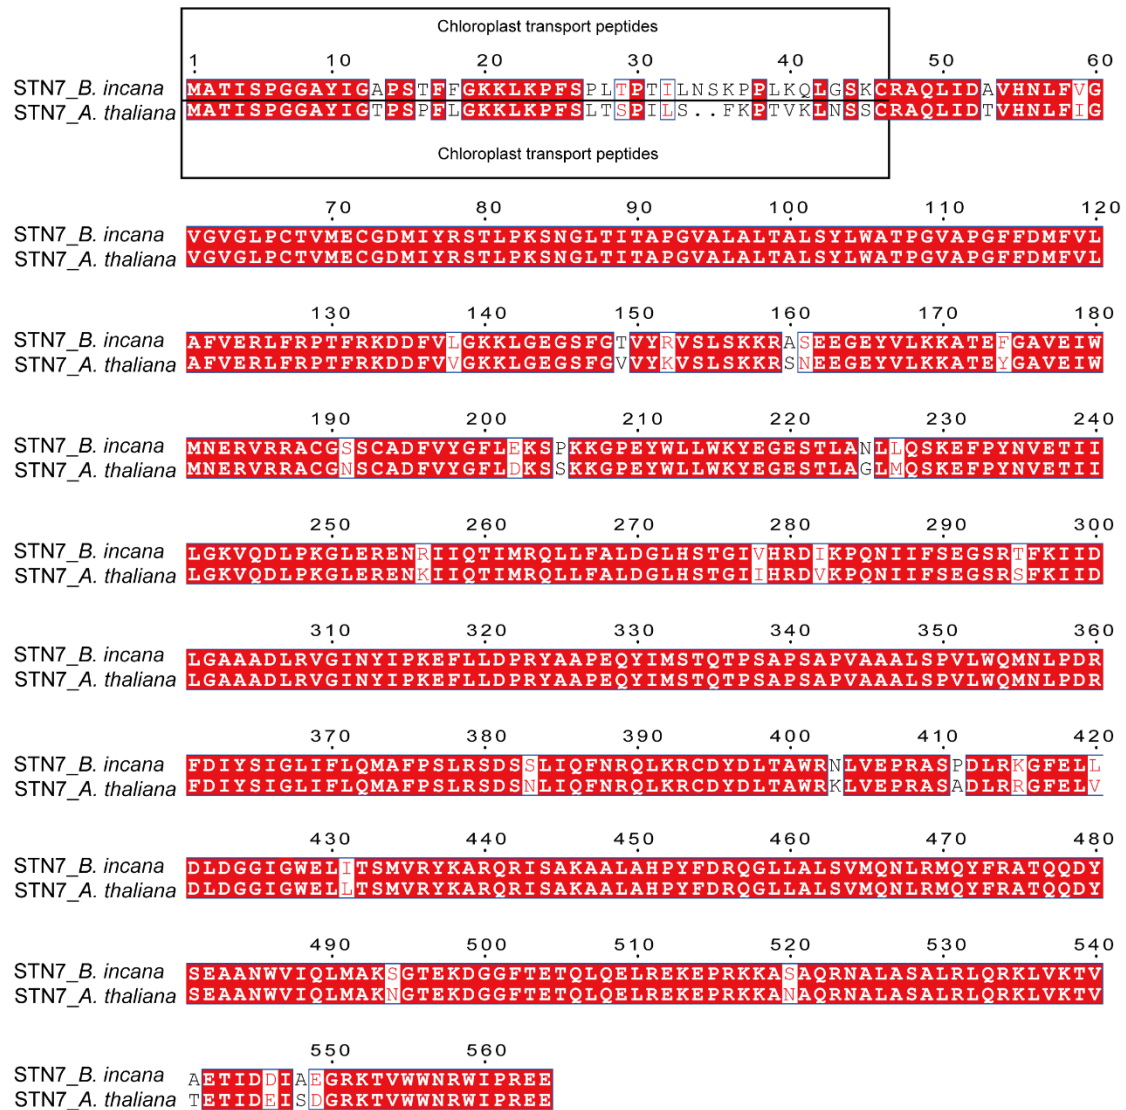

**Figure S2: Multiple sequence alignment of STN7 from *B. incana* and *A. thaliana***

Protein sequences were analyzed with the ESPript 3.0 online software. Chloroplast transport peptides determined using ChloroP1.1 online software are marked with black lines below the amino acid sequence.



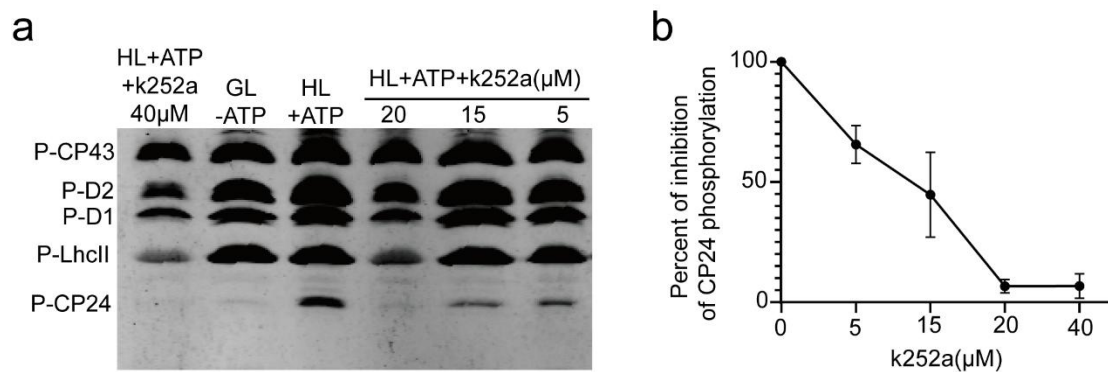

**Figure S4: Inhibition of CP24 phosphorylation with varying concentrations of k252a**

**a** Immunoblot analysis of chloroplasts exposed to growth light (GL, 100  $\mu\text{mol photons m}^{-2} \text{s}^{-1}$ ) in the absence of ATP, and chloroplasts exposed to high light (HL, 1,000  $\mu\text{mol photons m}^{-2} \text{s}^{-1}$ ) for 30 minutes in the presence of ATP, or in the presence of ATP and varying concentrations of k252a. The anti-P-Thr antibody was used to detect phosphorylated proteins. All lanes were loaded with 3  $\mu\text{g}$  Chl. **b** Extent of CP24 phosphorylation inhibition by k252a. Symbols and error bars represent the mean  $\pm$  SD calculated from two independent biological replicates.

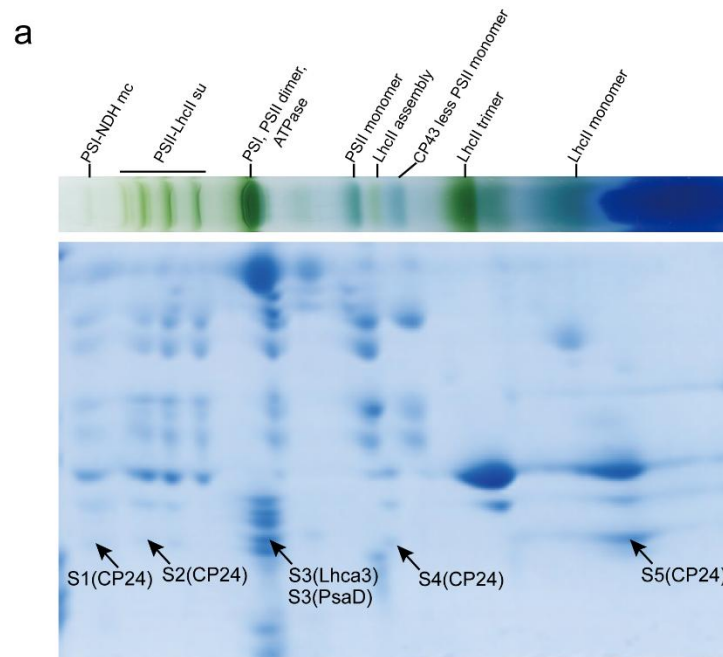

**b**

| Spot no. | Precursor ion mass(m/z)                          | Unique sequence                                                                         | Protein identity | GN number reference organism                     | Score/E-value                                             |
|----------|--------------------------------------------------|-----------------------------------------------------------------------------------------|------------------|--------------------------------------------------|-----------------------------------------------------------|
| S1       | 1917.7431                                        | TAENFANYTGDQGYPGGR                                                                      | CP24             | BnaC08g38660D (Brassica napus)                   | 149/2.6e-013                                              |
| S2       | 1064.6318<br>1917.9461                           | FFDPLGLAGK<br>TAENFANYTGDQGYPGGR                                                        | CP24             | BnaC05g12070D (Brassica napus)                   | 70/7e-005<br>161/4.8e-014                                 |
| S3       | 1650.6882<br>1810.7488<br>1938.8240<br>2936.3508 | EQIFEMPTGGAAIMR<br>AQVEEFYVITWNSPK<br>KAQVEEFYVITWNSPK<br>EAPVGFTPPQLDPNTPSPIFAGSTGGLLR | PsaD             | GA_TR2488_c0_g1_i1_g.8116 (Noccaea caerulescens) | 118/7.4e-010<br>90/4.2e-007<br>138/7.6e-012<br>61/0.00027 |
| S3       | 2225.9983<br>2635.0990                           | WADIKPGSVNTDPIFPNNK<br>LTGTDVGYPGGLWFDPLGWGSGSPAK                                       | Lhca3            | BnaC04g21740D (Brassica napus)                   | 112/2.6e-009<br>157/6e-014                                |
| S4       | 1917.8054                                        | TAENFANYTGDQGYPGGR                                                                      | CP24             | BnaC08g38660D (Brassica napus)                   | 161/3.1e-014                                              |
| S5       | 1064.5744<br>1917.8470                           | FFDPLGLAGK<br>TAENFANYTGDQGYPGGR                                                        | CP24             | BnaC05g12070D (Brassica napus)                   | 65/0.00031<br>173/2.8e-015                                |

**Figure S5: Analysis of proteins corresponding to the position of phosphorylated CP24 in *B. incana* thylakoids by MALDI-TOF-TOF MS/MS following 1p-BN/SDS-PAGE**

**a** The thylakoid membrane extracted from GL leaves ( $100 \mu\text{mol photons m}^{-2} \text{s}^{-1}$ ) were treated with  $\beta$ -DM and then complexes were separated by 1p-BN/SDS-PAGE. **b** The proteins corresponding to the position of molecular weight of P-CP24 (indicated by the arrow in **a**) in coomassie blue stain gel were identified by MALDI-TOF-TOF.

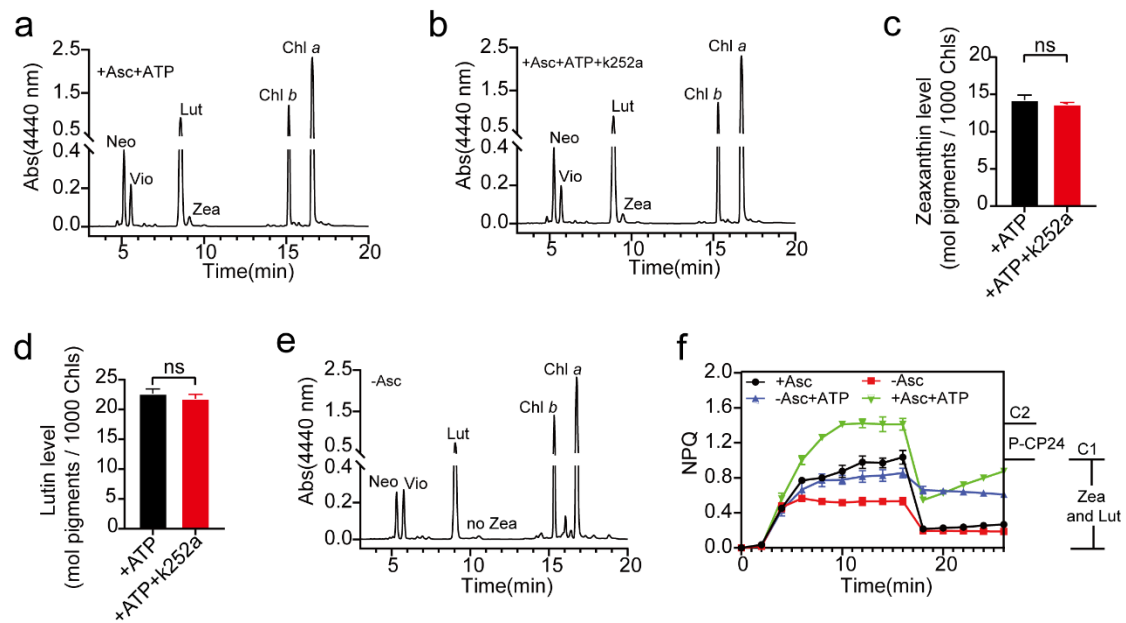

**Figure S6: HPLC analysis of total pigments extracted from chloroplasts**

**a** Pigments were extracted from functional chloroplasts exposed to HL ( $1,000 \mu\text{mol photons m}^{-2} \text{s}^{-1}$ ) for 30 min in the absence of k252a, followed by quantification via high-performance liquid chromatography (HPLC). **b** Pigment were extracted from functional chloroplasts treated with HL ( $1,000 \mu\text{mol photons m}^{-2} \text{s}^{-1}$ ) for 30 min in the presence of k252a, followed by quantification via HPLC. **c** Zeaxanthin levels were quantified by HPLC, as shown in **(a)** and **(b)**. **d** Lutein levels were quantified by HPLC, as shown in **(a)** and **(b)**. The production levels of zeaxanthin and lutein were compared under conditions with or without the inhibitor k252a using unpaired two-tailed t-tests. Statistical significance was defined as ns ( $p > 0.05$ ), not significant. **e** Pigment were extracted from functional chloroplasts treated with HL of  $1,000 \mu\text{mol photons m}^{-2} \text{s}^{-1}$  for 30 min in the absence of Asc, followed by quantification via HPLC. **f** The contribution decomposition of NPQ induced by actinic light of  $1000 \mu\text{mol photons m}^{-2} \text{s}^{-1}$ . NPQ of the functional chloroplast in the presence of Asc and absence of ATP (+ Asc). NPQ of the functional chloroplast in the presence of Asc and ATP (+ Asc + ATP). NPQ of the functional chloroplast in the absence of Asc and ATP (- Asc). NPQ of the functional chloroplast in the presence of ATP and absence of Asc (- Asc + ATP). The pigment data are normalized to 1000 Chl *a* + *b* molecules. Symbols and error bars represent the mean  $\pm$  SD calculated from three independent biological replicates.

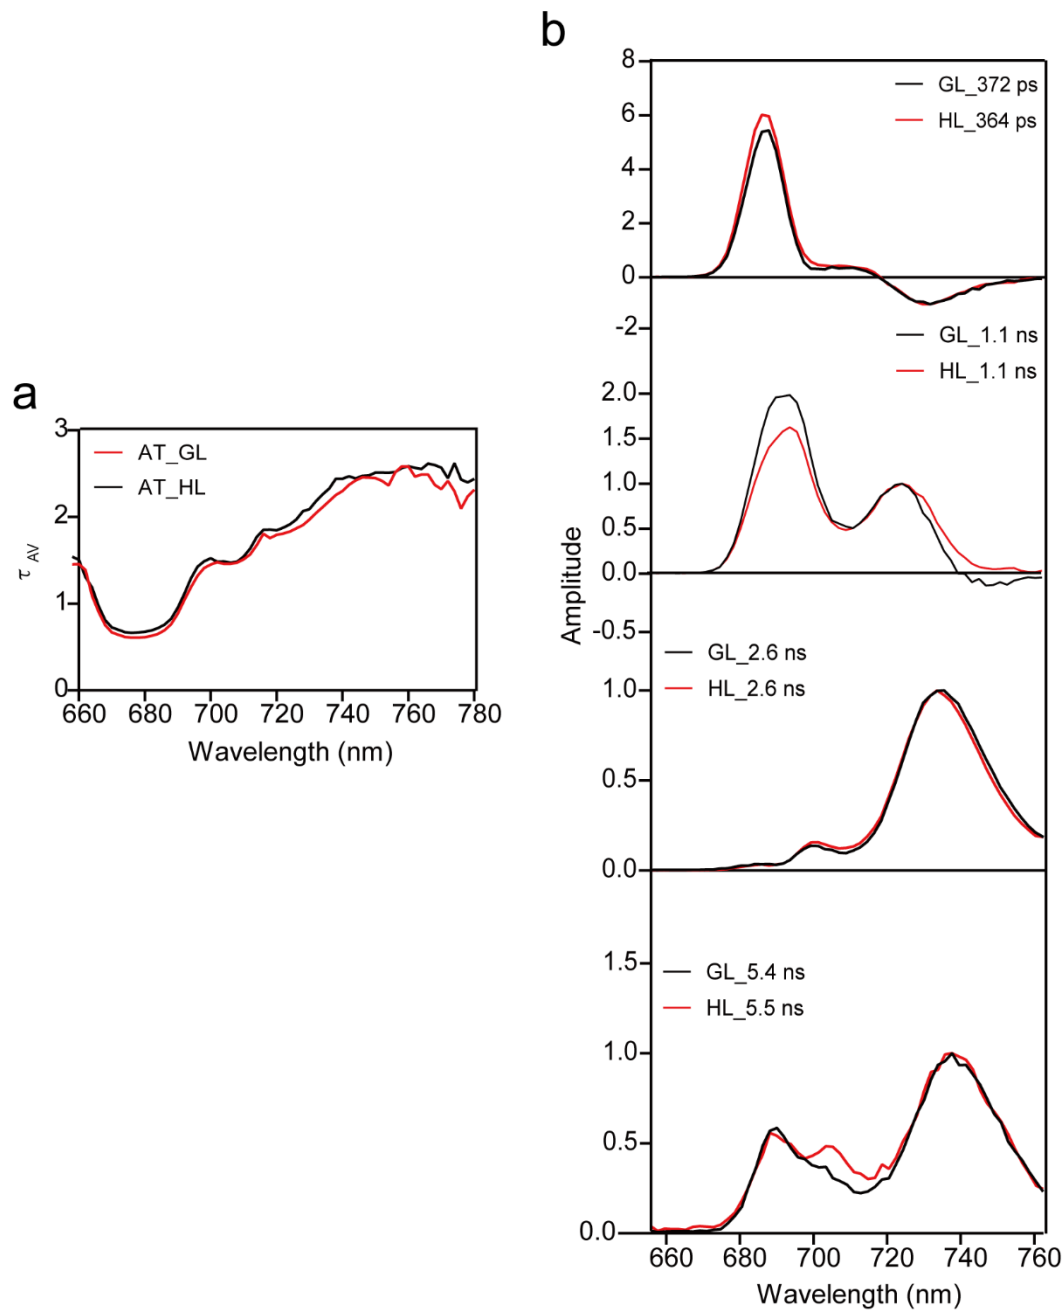

**Figure S7: HL does not promote energy dissipation at around 695 nm in *A. thaliana***

**a** Average fluorescence lifetime ( $\tau_{AV}$ ) were measured in thylakoid membranes isolated from *A. thaliana* under GL (50  $\mu\text{mol photons m}^{-2} \text{s}^{-1}$ ) and HL (1000  $\mu\text{mol photons m}^{-2} \text{s}^{-1}$ ) conditions. **b** Time-resolved fluorescence decay-associated spectra (DAS) analysis was performed on thylakoid membranes isolated from *A. thaliana* grown under GL (50  $\mu\text{mol photons m}^{-2} \text{s}^{-1}$ ) and HL (1000  $\mu\text{mol photons m}^{-2} \text{s}^{-1}$ ) conditions. DAS components were normalized to the maximum fluorescence intensity of the corresponding PSI-associated lifetime components. Samples were excited at 480 nm with a chlorophyll concentration of 2  $\mu\text{g mL}^{-1}$ .

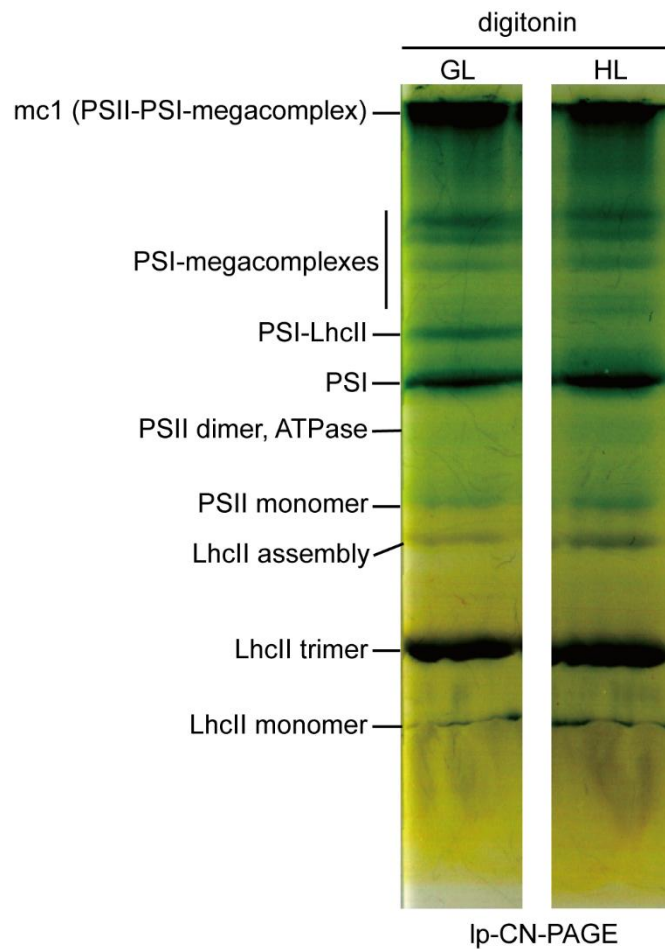

**Figure S8: LpCN-PAGE profiles of thylakoids from *B. incana***

Thylakoids were isolated from *B. incana* leaves exposed to either GL (50  $\mu\text{mol photons m}^{-2} \text{s}^{-1}$ ) or HL (1000  $\mu\text{mol photons m}^{-2} \text{s}^{-1}$ ) for 2 hours. Isolated thylakoids were solubilized with 1% (v/v) digitonin (final concentration) and subjected to IpCN-PAGE. For each lane, 10  $\mu\text{g}$  of Chl was loaded.



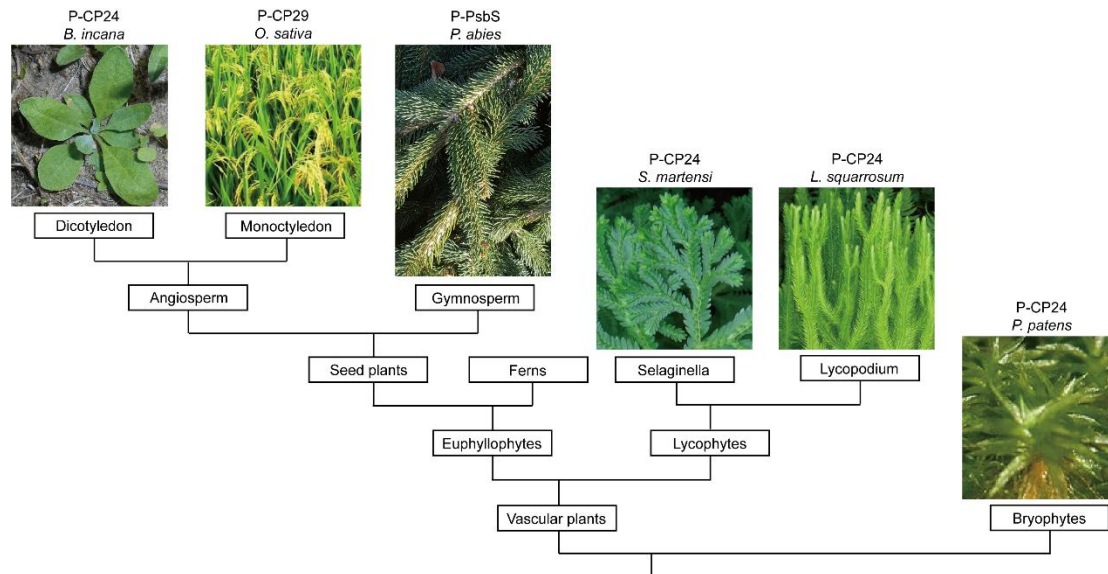

**Figure S9: Evolutionary reduction of terrestrial plant phylogeny reveals lineage-specific phosphoprotein signatures.**

The latter group comprises non-vascular plants, specifically bryophytes (including mosses and liverworts), and vascular plants. Among mosses, *P. patens* exhibits extensive phosphorylation of CP24, though its functional significance remains unclear. Within vascular plants, the earliest phylogenetic divergence separates lycophytes from euphyllophytes. The lycophyte lineage includes two major clades: *Selaginella* (spikemosses) and *Lycopodium* (club mosses), which exhibit substantial CP24 phosphorylation. Euphyllophytes consist of ferns and their allies, along with all seed plants. Seed plants are further classified into angiosperms and gymnosperms. Angiosperms are divided into dicotyledons and monocotyledons. The dicotyledonous plant *B. incana* studied in this work represents the first seed plant reported to exhibit substantial CP24 phosphorylation. In contrast, substantial CP29 phosphorylation has been documented in the monocotyledon *O. sativa*. In gymnosperms, substantial phosphorylation of PsbS has been detected in the Norwegian spruce (*P. abies*).
