# Supplementary material for: High light-induced phosphorylation of Lhcb6 (CP24) enhances non-photochemical quenching dependent on the PSI-PSII megacomplexes
Source: Research Square preprint supplement (doi:10.21203/rs.3.rs-7613824/v1), 2025-10-29
Supplement: Supplementary file 2 [file a30aac722404bddb3c7ba30e.xlsx]

## Sheet: Supplementary Table 1
Supplementary Table 1: Comprehensively identified phosphorylated peptides
PTM.ProteinId	Site AA	Site Location	Quantity (GL_1)	Quantity (GL_2)	Quantity (HL_1)	Quantity (HL_2)
CL1.Contig1_All	S	890	4844.09	5235.22	3955.17	4458.83
CL1.Contig2_All	S	890	4844.09	5235.22	3955.17	4458.83
CL1.Contig1_All	S	890	435.633	503.414	422.336	321.579
CL1.Contig1_All	S	880	435.633	503.414	422.336	321.579
CL1.Contig2_All	S	890	435.633	503.414	422.336	321.579
CL1.Contig2_All	S	880	435.633	503.414	422.336	321.579
CL1.Contig1_All	S	638	466.461	404.237	547.536	491.082
CL1.Contig2_All	S	638	466.461	404.237	547.536	491.082
CL1.Contig1_All	S	626	Filtered	334.876	277.244	Filtered
CL1.Contig2_All	S	626	Filtered	334.876	277.244	Filtered
CL1.Contig1_All	S	629	Filtered	Filtered	Filtered	253.472
CL1.Contig2_All	S	629	Filtered	Filtered	Filtered	253.472
CL1.Contig1_All	S	629	169.632	192.111	219.213	187.824
CL1.Contig1_All	S	626	169.632	192.111	219.213	187.824
CL1.Contig2_All	S	629	169.632	192.111	219.213	187.824
CL1.Contig2_All	S	626	169.632	192.111	219.213	187.824
CL1.Contig1_All	S	865	1360.22	1487.25	675.498	826.346
CL1.Contig2_All	S	865	1360.22	1487.25	675.498	826.346
CL1.Contig1_All	S	865	48.9569	49.7524	38.0847	23.5046
CL1.Contig1_All	S	863	31.5842	39.0964	20.5203	23.5046
CL1.Contig2_All	S	865	48.9569	49.7524	38.0847	23.5046
CL1.Contig2_All	S	863	31.5842	39.0964	20.5203	23.5046
CL1.Contig1_All	T	867	17.3727	10.656	17.5644	Filtered
CL1.Contig2_All	T	867	17.3727	10.656	17.5644	Filtered
CL1.Contig1_All	S	642	577.106	518.671	366.569	384.642
CL1.Contig2_All	S	642	577.106	518.671	366.569	384.642
CL1.Contig1_All	S	202	482.005	311.237	359.264	237.828
CL1.Contig2_All	S	202	482.005	311.237	359.264	237.828
CL1.Contig1_All	M	200	130.561	Filtered	110.728	Filtered
CL1.Contig2_All	M	200	130.561	Filtered	110.728	Filtered
CL1.Contig1_All	S	480	81.5462	Filtered	166.172	71.8507
CL1.Contig2_All	S	480	81.5462	Filtered	166.172	71.8507
CL1.Contig1_All	S	723	Filtered	Filtered	67.2422	Filtered
CL1.Contig2_All	S	723	Filtered	Filtered	67.2422	Filtered
CL1.Contig1_All	S	1121	78.2079	113.285	110.495	134.117
CL1.Contig1_All	S	1118	78.2079	113.285	110.495	134.117
CL1.Contig2_All	S	1121	78.2079	113.285	110.495	134.117
CL1.Contig2_All	S	1118	78.2079	113.285	110.495	134.117
CL1.Contig1_All	S	1118	35.1693	Filtered	122.007	Filtered
CL1.Contig2_All	S	1118	35.1693	Filtered	122.007	Filtered
CL1.Contig1_All	S	1121	37.1585	43.4314	21.8037	18.2152
CL1.Contig1_All	S	1118	37.1585	43.4314	21.8037	18.2152
CL1.Contig1_All	S	1114	37.1585	43.4314	21.8037	18.2152
CL1.Contig2_All	S	1121	37.1585	43.4314	21.8037	18.2152
CL1.Contig2_All	S	1118	37.1585	43.4314	21.8037	18.2152
CL1.Contig2_All	S	1114	37.1585	43.4314	21.8037	18.2152
CL1.Contig1_All	M	1123	Filtered	25.4992	27.7854	29.8257
CL1.Contig2_All	M	1123	Filtered	25.4992	27.7854	29.8257
CL1.Contig1_All	S	629	180.585	96.2397	160.846	129.999
CL1.Contig1_All	S	626	180.585	96.2397	160.846	129.999
CL1.Contig1_All	S	624	180.585	96.2397	160.846	129.999
CL1.Contig1_All	S	620	180.585	96.2397	160.846	129.999
CL1.Contig2_All	S	629	180.585	96.2397	160.846	129.999
CL1.Contig2_All	S	626	180.585	96.2397	160.846	129.999
CL1.Contig2_All	S	624	180.585	96.2397	160.846	129.999
CL1.Contig2_All	S	620	180.585	96.2397	160.846	129.999
CL1.Contig1_All	S	620	29.3831	27.3721	36.2628	Filtered
CL1.Contig2_All	S	620	29.3831	27.3721	36.2628	Filtered
CL1.Contig1_All	S	463	Filtered	65.8354	Filtered	Filtered
CL1.Contig1_All	C	459	Filtered	65.8354	Filtered	Filtered
CL1.Contig2_All	S	463	Filtered	65.8354	Filtered	Filtered
CL1.Contig2_All	C	459	Filtered	65.8354	Filtered	Filtered
CL1.Contig1_All	S	1062	166.038	175.681	110.938	135.018
CL1.Contig2_All	S	1062	166.038	175.681	110.938	135.018
CL1.Contig1_All	S	410	Filtered	39.7214	35.0444	Filtered
CL1.Contig2_All	S	410	Filtered	39.7214	35.0444	Filtered
CL1.Contig1_All	S	417	32.6522	43.6553	31.3819	33.0577
CL1.Contig2_All	S	417	32.6522	43.6553	31.3819	33.0577
CL1.Contig1_All	S	338	163.054	97.1849	180.298	49.5898
CL1.Contig2_All	S	338	163.054	97.1849	180.298	49.5898
CL1.Contig1_All	S	196	109.919	45.8802	56.813	31.0614
CL1.Contig2_All	S	196	109.919	45.8802	56.813	31.0614
CL1.Contig1_All	S	1266	53.7471	39.8621	56.9575	33.5593
CL1.Contig2_All	S	1266	53.7471	39.8621	56.9575	33.5593
CL1.Contig1_All	S	1092	Filtered	38.4973	30.9804	45.1403
CL1.Contig2_All	S	1092	Filtered	38.4973	30.9804	45.1403
CL1.Contig1_All	C	703	41.4357	54.2974	28.64	33.4088
CL1.Contig1_All	S	693	41.4357	54.2974	28.64	33.4088
CL1.Contig2_All	C	703	41.4357	54.2974	28.64	33.4088
CL1.Contig2_All	S	693	41.4357	54.2974	28.64	33.4088
CL1.Contig1_All	S	957	12.4637	16.1595	Filtered	Filtered
CL1.Contig2_All	S	957	12.4637	16.1595	Filtered	Filtered
CL1.Contig1_All	S	928	Filtered	21.4221	Filtered	Filtered
CL1.Contig2_All	S	928	Filtered	21.4221	Filtered	Filtered
CL1.Contig3_All	S	560	363.832	353.054	68.7076	229.049
CL1.Contig3_All	S	569	44.3682	61.5384	72.8951	32.8528
CL1.Contig3_All	S	566	44.3682	61.5384	72.8951	32.8528
CL1.Contig3_All	S	560	44.3682	61.5384	72.8951	32.8528
CL1.Contig3_All	S	564	44.3682	Filtered	10.6826	32.8528
CL1.Contig3_All	S	478	444.077	663.394	377.608	Filtered
CL1.Contig3_All	S	1129	336.856	334.021	Filtered	148.593
CL1.Contig3_All	S	1127	Filtered	335.777	Filtered	126.882
CL1.Contig3_All	T	1138	Filtered	237.445	Filtered	150.562
CL1.Contig3_All	S	634	Filtered	Filtered	222.799	309.876
CL1.Contig3_All	S	628	Filtered	Filtered	222.799	309.876
CL1.Contig3_All	S	634	97.5812	110.282	56.7851	48.1974
CL1.Contig3_All	S	636	Filtered	106.189	Filtered	Filtered
CL1.Contig3_All	S	1092	767.26	818.072	522.185	571.382
CL1.Contig3_All	S	202	651.461	445.297	290.604	386.653
CL1.Contig3_All	M	200	140.322	Filtered	Filtered	94.4582
CL1.Contig3_All	S	608	361.399	402.819	193.654	229.629
CL1.Contig3_All	S	616	Filtered	Filtered	Filtered	12.8595
CL1.Contig3_All	S	582	397.061	406.246	254.442	359.934
CL1.Contig3_All	S	484	238.601	Filtered	149.679	139.573
CL1.Contig3_All	S	220	20.1283	Filtered	16.3568	Filtered
CL1.Contig3_All	S	260	54.8929	56.4278	Filtered	32.2699
CL1.Contig3_All	S	566	Filtered	38.3786	22.6979	35.7324
CL1.Contig3_All	S	720	110.356	Filtered	Filtered	Filtered
CL1.Contig3_All	S	976	38.7594	116.037	4.74094	23.0533
CL1.Contig3_All	C	970	38.7594	116.037	4.74094	23.0533
CL1.Contig3_All	S	463	40.303	19.4811	Filtered	Filtered
CL1.Contig3_All	S	1120	Filtered	35.6442	Filtered	20.9091
CL1.Contig3_All	C	1118	Filtered	35.6442	Filtered	20.9091
CL10.Contig1_All	S	27	6277.67	6265.17	6500.15	5766.84
CL10.Contig2_All	S	27	6277.67	6265.17	6500.15	5766.84
CL10.Contig3_All	S	27	6277.67	6265.17	6500.15	5766.84
CL10.Contig1_All	S	27	649.347	546.744	398.727	391.638
CL10.Contig1_All	T	24	584.247	482.862	398.727	391.638
CL10.Contig2_All	S	27	649.347	546.744	398.727	391.638
CL10.Contig2_All	T	24	584.247	482.862	398.727	391.638
CL10.Contig3_All	S	27	649.347	546.744	398.727	391.638
CL10.Contig3_All	T	24	584.247	482.862	398.727	391.638
CL10.Contig1_All	T	31	65.1001	63.882	Filtered	Filtered
CL10.Contig2_All	T	31	65.1001	63.882	Filtered	Filtered
CL10.Contig3_All	T	31	65.1001	63.882	Filtered	Filtered
CL10.Contig1_All	S	27	Filtered	61.9404	51.8877	39.0931
CL10.Contig1_All	T	24	Filtered	61.9404	51.8877	39.0931
CL10.Contig1_All	S	22	Filtered	61.9404	51.8877	39.0931
CL10.Contig2_All	S	27	Filtered	61.9404	51.8877	39.0931
CL10.Contig2_All	T	24	Filtered	61.9404	51.8877	39.0931
CL10.Contig2_All	S	22	Filtered	61.9404	51.8877	39.0931
CL10.Contig3_All	S	27	Filtered	61.9404	51.8877	39.0931
CL10.Contig3_All	T	24	Filtered	61.9404	51.8877	39.0931
CL10.Contig3_All	S	22	Filtered	61.9404	51.8877	39.0931
CL10.Contig1_All	S	543	Filtered	Filtered	971.233	Filtered
CL10.Contig2_All	S	543	Filtered	Filtered	971.233	Filtered
CL10.Contig3_All	S	543	Filtered	Filtered	971.233	Filtered
CL10.Contig1_All	S	547	Filtered	Filtered	Filtered	580.329
CL10.Contig2_All	S	547	Filtered	Filtered	Filtered	580.329
CL10.Contig3_All	S	547	Filtered	Filtered	Filtered	580.329
CL10.Contig1_All	S	622	165.545	119.986	79.2563	Filtered
CL10.Contig2_All	S	622	165.545	119.986	79.2563	Filtered
CL10.Contig3_All	S	622	165.545	119.986	79.2563	Filtered
CL10.Contig1_All	S	625	Filtered	22.9119	25.4633	Filtered
CL10.Contig2_All	S	625	Filtered	22.9119	25.4633	Filtered
CL10.Contig3_All	S	625	Filtered	22.9119	25.4633	Filtered
CL10.Contig1_All	S	532	108.231	Filtered	728.918	599.612
CL10.Contig2_All	S	532	108.231	Filtered	728.918	599.612
CL10.Contig3_All	S	532	108.231	Filtered	728.918	599.612
CL10.Contig1_All	S	637	114.051	116.26	65.9605	95.8443
CL10.Contig2_All	S	637	114.051	116.26	65.9605	95.8443
CL10.Contig3_All	S	637	114.051	116.26	65.9605	95.8443
CL10.Contig1_All	S	427	67.6835	Filtered	76.8132	78.961
CL10.Contig2_All	S	427	67.6835	Filtered	76.8132	78.961
CL10.Contig3_All	S	427	67.6835	Filtered	76.8132	78.961
CL10.Contig1_All	S	210	67.768	91.9205	44.4851	48.5702
CL10.Contig2_All	S	210	67.768	91.9205	44.4851	48.5702
CL10.Contig3_All	S	210	67.768	91.9205	44.4851	48.5702
CL100.Contig3_All	S	76	149.451	Filtered	144.167	119.475
CL100.Contig4_All	S	76	149.451	Filtered	144.167	119.475
CL1003.Contig1_All	S	506	268.998	265.066	271.781	319.698
CL1003.Contig2_All	S	497	268.998	265.066	271.781	319.698
CL1004.Contig1_All	T	908	Filtered	236.144	Filtered	265.71
CL1008.Contig1_All	S	45	Filtered	Filtered	Filtered	149.684
CL1008.Contig1_All	S	42	Filtered	Filtered	70.9331	Filtered
CL1008.Contig1_All	C	281	43.5858	22.9658	81.3213	80.6965
CL1008.Contig1_All	S	278	43.5858	22.9658	81.3213	80.6965
CL101.Contig1_All	S	418	295.111	Filtered	259.19	Filtered
CL101.Contig1_All	T	416	Filtered	Filtered	Filtered	25.0268
CL101.Contig1_All	S	8	525.18	398.699	651.417	983.155
CL1014.Contig1_All	M	594	90.4608	96.4995	67.4947	Filtered
CL1014.Contig1_All	S	593	179.903	179.446	137.621	76.8305
CL1014.Contig2_All	M	594	90.4608	96.4995	67.4947	Filtered
CL1014.Contig2_All	S	593	179.903	179.446	137.621	76.8305
CL1014.Contig4_All	M	594	90.4608	96.4995	67.4947	Filtered
CL1014.Contig4_All	S	593	179.903	179.446	137.621	76.8305
CL1014.Contig1_All	S	263	55.3324	36.7273	146.312	150.766
CL1014.Contig2_All	S	263	55.3324	36.7273	146.312	150.766
CL1014.Contig4_All	S	263	55.3324	36.7273	146.312	150.766
CL1017.Contig5_All	S	505	193.438	185.235	304.591	300.311
CL1017.Contig6_All	S	505	193.438	185.235	304.591	300.311
CL1017.Contig5_All	S	519	255.518	232.463	194.507	191.662
CL1017.Contig6_All	S	519	255.518	232.463	194.507	191.662
CL1018.Contig2_All	S	171	171.404	164.766	210.987	747.841
CL1018.Contig2_All	S	169	Filtered	Filtered	205.035	Filtered
CL1018.Contig2_All	S	331	Filtered	Filtered	Filtered	517.917
CL1020.Contig1_All	S	572	Filtered	131.085	165.332	157.113
CL1020.Contig2_All	S	572	Filtered	131.085	165.332	157.113
CL1020.Contig3_All	S	572	Filtered	131.085	165.332	157.113
CL1020.Contig4_All	S	572	Filtered	131.085	165.332	157.113
CL103.Contig2_All	S	117	80.7768	Filtered	Filtered	Filtered
CL1035.Contig7_All	S	107	7683.1	8588.46	8925.12	10433.4
CL1035.Contig7_All	S	107	60.3466	Filtered	350.629	652.396
CL1035.Contig7_All	S	101	56.3937	Filtered	350.629	652.396
CL1035.Contig7_All	Y	104	3.95292	Filtered	Filtered	Filtered
CL1035.Contig7_All	S	97	322.481	318.047	547.008	515.976
CL1035.Contig7_All	T	83	172.687	165.375	225.06	175.419
CL1046.Contig1_All	Y	189	74.9758	43.7702	Filtered	Filtered
CL1046.Contig4_All	Y	189	74.9758	43.7702	Filtered	Filtered
CL105.Contig1_All	S	211	481.081	477.869	709.582	398.677
CL1066.Contig10_All	S	183	856.281	697.357	842.212	779.512
CL1066.Contig8_All	S	215	856.281	697.357	842.212	779.512
CL1066.Contig10_All	Y	37	276.416	394.943	310.341	373.596
CL1066.Contig10_All	T	33	276.416	394.943	310.341	373.596
CL1066.Contig8_All	Y	69	276.416	394.943	310.341	373.596
CL1066.Contig8_All	T	65	276.416	394.943	310.341	373.596
CL1066.Contig10_All	S	119	247.722	227.336	Filtered	Filtered
CL1066.Contig8_All	S	151	247.722	227.336	Filtered	Filtered
CL1066.Contig10_All	S	165	18.2474	Filtered	Filtered	Filtered
CL1066.Contig8_All	S	197	18.2474	Filtered	Filtered	Filtered
CL1066.Contig13_All	Y	82	Filtered	148.699	Filtered	Filtered
CL1066.Contig17_All	Y	82	Filtered	148.699	Filtered	Filtered
CL1066.Contig18_All	Y	82	Filtered	148.699	Filtered	Filtered
CL1066.Contig2_All	Y	82	Filtered	148.699	Filtered	Filtered
CL1066.Contig20_All	Y	82	Filtered	148.699	Filtered	Filtered
CL1066.Contig13_All	T	71	289.104	Filtered	385.755	212.028
CL1066.Contig17_All	T	71	289.104	Filtered	385.755	212.028
CL1066.Contig18_All	T	71	289.104	Filtered	385.755	212.028
CL1066.Contig2_All	T	71	289.104	Filtered	385.755	212.028
CL1066.Contig20_All	T	71	289.104	Filtered	385.755	212.028
CL1068.Contig2_All	S	292	923.018	1216.11	1317.03	1237.44
CL1068.Contig2_All	S	112	961.477	974.177	511.513	632.978
CL1068.Contig2_All	S	15	461.609	569.124	498.276	875.127
CL1068.Contig2_All	S	246	201.542	185.624	164.521	132.086
CL1068.Contig2_All	S	154	Filtered	Filtered	42.0623	Filtered
CL1068.Contig2_All	S	257	Filtered	Filtered	Filtered	85.1222
CL1070.Contig1_All	S	44	455.828	504.624	349.972	399.759
CL1070.Contig1_All	S	43	455.828	504.624	349.972	399.759
CL1070.Contig1_All	T	18	206.908	224.82	256.203	224.957
CL1070.Contig1_All	M	17	37.2361	41.7215	35.6594	43.1804
CL1070.Contig1_All	S	217	Filtered	Filtered	Filtered	30.9358
CL1072.Contig4_All	S	50	Filtered	54.71	106.627	Filtered
CL108.Contig1_All	S	562	280.249	Filtered	312.587	308.376
CL108.Contig1_All	S	554	Filtered	37.3971	49.2555	37.1939
CL108.Contig1_All	S	542	240.892	262.133	176.02	170.42
CL108.Contig1_All	S	509	90.3408	171.423	75.7297	143.106
CL1082.Contig1_All	S	307	2731.31	2266.02	1950.94	1064.96
CL1082.Contig1_All	S	285	72.1213	62.885	52.2644	96.4303
CL1084.Contig1_All	S	53	57.4666	57.66	54.5318	Filtered
CL1086.Contig10_All	S	111	989.519	855.809	1113.63	970.658
CL1086.Contig11_All	S	111	989.519	855.809	1113.63	970.658
CL1086.Contig5_All	S	293	989.519	855.809	1113.63	970.658
CL1086.Contig6_All	S	293	989.519	855.809	1113.63	970.658
CL1086.Contig10_All	T	113	33.3328	43.4225	Filtered	37.0799
CL1086.Contig10_All	S	111	33.3328	43.4225	Filtered	37.0799
CL1086.Contig11_All	T	113	33.3328	43.4225	Filtered	37.0799
CL1086.Contig11_All	S	111	33.3328	43.4225	Filtered	37.0799
CL1086.Contig5_All	T	295	33.3328	43.4225	Filtered	37.0799
CL1086.Contig5_All	S	293	33.3328	43.4225	Filtered	37.0799
CL1086.Contig6_All	T	295	33.3328	43.4225	Filtered	37.0799
CL1086.Contig6_All	S	293	33.3328	43.4225	Filtered	37.0799
CL1086.Contig10_All	S	166	170.712	65.5139	59.568	249.041
CL1086.Contig11_All	S	166	170.712	65.5139	59.568	249.041
CL1086.Contig5_All	S	348	170.712	65.5139	59.568	249.041
CL1086.Contig6_All	S	348	170.712	65.5139	59.568	249.041
CL1086.Contig10_All	S	161	Filtered	Filtered	Filtered	188.953
CL1086.Contig11_All	S	161	Filtered	Filtered	Filtered	188.953
CL1086.Contig5_All	S	343	Filtered	Filtered	Filtered	188.953
CL1086.Contig6_All	S	343	Filtered	Filtered	Filtered	188.953
CL1086.Contig10_All	S	108	Filtered	226.489	Filtered	258.569
CL1086.Contig11_All	S	108	Filtered	226.489	Filtered	258.569
CL1086.Contig5_All	S	290	Filtered	226.489	Filtered	258.569
CL1086.Contig6_All	S	290	Filtered	226.489	Filtered	258.569
CL1086.Contig10_All	S	144	18.1266	Filtered	Filtered	36.3251
CL1086.Contig11_All	S	144	18.1266	Filtered	Filtered	36.3251
CL1086.Contig5_All	S	326	18.1266	Filtered	Filtered	36.3251
CL1086.Contig6_All	S	326	18.1266	Filtered	Filtered	36.3251
CL1088.Contig1_All	S	418	407.99	392.646	295.865	283.853
CL1088.Contig2_All	S	101	460.511	534.429	524.031	454.776
CL1088.Contig2_All	C	97	Filtered	80.4093	80.6831	Filtered
CL1088.Contig2_All	Y	58	Filtered	Filtered	4.08116	Filtered
CL1091.Contig2_All	S	515	90.1042	508.094	Filtered	39.8741
CL1091.Contig2_All	S	304	Filtered	Filtered	423.734	467.721
CL1091.Contig2_All	T	303	Filtered	444.736	Filtered	Filtered
CL1099.Contig1_All	S	267	1058.63	801.379	1361.05	1418.86
CL1099.Contig6_All	S	267	1058.63	801.379	1361.05	1418.86
CL1099.Contig1_All	T	263	Filtered	Filtered	71.931	Filtered
CL1099.Contig6_All	T	263	Filtered	Filtered	71.931	Filtered
CL1099.Contig1_All	S	62	43.1851	42.0078	Filtered	Filtered
CL1099.Contig1_All	C	50	43.1851	42.0078	Filtered	Filtered
CL1099.Contig6_All	S	62	43.1851	42.0078	Filtered	Filtered
CL1099.Contig6_All	C	50	43.1851	42.0078	Filtered	Filtered
CL1099.Contig1_All	T	285	Filtered	9.33228	Filtered	Filtered
CL1099.Contig6_All	T	285	Filtered	9.33228	Filtered	Filtered
CL1099.Contig1_All	S	283	Filtered	6.33385	Filtered	Filtered
CL1099.Contig6_All	S	283	Filtered	6.33385	Filtered	Filtered
CL1100.Contig1_All	S	95	10205.5	9451.77	10684.7	11682.4
CL1100.Contig2_All	S	95	10205.5	9451.77	10684.7	11682.4
Unigene17663_All	S	98	10205.5	9451.77	10684.7	11682.4
Unigene20683_All	S	20	10205.5	9451.77	10684.7	11682.4
CL1102.Contig1_All	S	400	38149.8	40967.9	37885.9	41409.9
CL1102.Contig1_All	S	400	5701.52	7910.78	7937.74	2083.63
CL1102.Contig1_All	S	398	5701.52	7910.78	7937.74	2083.63
CL1102.Contig1_All	S	479	10103.1	10516.6	9666.91	8847.48
CL1102.Contig1_All	S	479	6295.72	4536.79	5355.68	7425.55
CL1102.Contig1_All	T	478	5761.59	3992.12	5355.68	6624.66
CL1102.Contig1_All	S	485	1650.44	1476.75	2052.84	2137.38
CL1102.Contig1_All	S	485	534.129	544.664	Filtered	800.892
CL1102.Contig1_All	T	475	419.488	Filtered	Filtered	420.477
CL1102.Contig1_All	S	473	Filtered	Filtered	Filtered	41.9328
CL1102.Contig1_All	S	470	Filtered	Filtered	Filtered	41.9328
CL1102.Contig1_All	S	450	22802	26884	30461	37770.5
CL1102.Contig1_All	S	4	5979.42	6303.48	6865.91	6183.38
CL1102.Contig1_All	S	2	4033.85	3843.44	Filtered	Filtered
CL1102.Contig1_All	S	4	5249.41	5624.4	6300.84	5457.93
CL1102.Contig1_All	S	2	5249.41	5624.4	6300.84	5457.93
CL1102.Contig1_All	S	10	1477.5	1589.21	1817.85	1590.58
CL1102.Contig1_All	S	4	1477.5	1589.21	1817.85	1590.58
CL1102.Contig1_All	S	2	1477.5	1589.21	1817.85	1590.58
CL1102.Contig1_All	S	530	33421.5	32573.2	35809.9	41587.7
CL1102.Contig1_All	S	537	20.129	182.163	179.42	298.091
CL1102.Contig1_All	S	530	20.129	182.163	179.42	298.091
CL1102.Contig1_All	S	413	7691.81	7867.45	6730.54	7706.12
CL1102.Contig1_All	S	420	1136.68	1057.45	1438.89	1759.02
CL1102.Contig1_All	S	413	1130.85	1053.2	1438.89	1712.97
CL1102.Contig1_All	S	420	1191.56	631.473	1811.4	1852.44
CL1102.Contig1_All	T	419	5.83153	4.24875	Filtered	46.052
CL1102.Contig1_All	S	674	2604.2	2948.3	3789.99	3564.66
CL1102.Contig1_All	S	690	753.723	731.45	Filtered	1329.3
CL1102.Contig1_All	S	674	753.723	731.45	10.0856	1329.3
CL1102.Contig1_All	T	683	Filtered	Filtered	10.0856	Filtered
CL1102.Contig1_All	S	563	2750.06	2500.6	3183.27	3574.07
CL1102.Contig1_All	S	562	2629.97	2500.6	3054	3440.51
CL1102.Contig1_All	S	563	1996.29	1963.45	1621.8	2278.95
CL1102.Contig1_All	S	563	908.699	416.348	876.603	271.11
CL1102.Contig1_All	S	562	848.053	357.604	809.151	199.22
CL1102.Contig1_All	S	558	869.268	163.836	412.655	271.11
CL1102.Contig1_All	T	561	365.473	416.348	802.123	271.11
CL1102.Contig1_All	S	558	137.782	19.3676	135.159	158.978
CL1102.Contig1_All	S	562	41.9114	Filtered	38.0447	53.5376
CL1102.Contig1_All	T	561	17.6922	19.3676	5.89584	25.4162
CL1102.Contig1_All	T	292	9241.71	9468.25	9194.62	9842.57
CL1102.Contig1_All	T	292	104.434	69.8242	138.047	107.564
CL1102.Contig1_All	S	291	104.434	69.8242	138.047	107.564
CL1102.Contig1_All	S	860	3635.2	3330.94	4547.57	5329.22
CL1102.Contig1_All	S	858	3645.62	3330.94	4655.89	5424.49
CL1102.Contig1_All	S	856	3645.62	3330.94	4655.89	5424.49
CL1102.Contig1_All	S	854	3246.94	2695.4	4270.19	5019.81
CL1102.Contig1_All	S	572	2203.94	3212.6	Filtered	2779.47
CL1102.Contig1_All	S	351	1873.9	1629.45	894.169	2078.66
CL1102.Contig1_All	T	345	Filtered	Filtered	Filtered	188.835
CL1102.Contig1_All	S	343	182.885	114.42	151.756	Filtered
CL1102.Contig1_All	S	351	192.358	191.837	273.628	289.287
CL1102.Contig1_All	T	350	192.358	191.837	273.628	289.287
CL1102.Contig1_All	T	345	20.7988	Filtered	9.78265	Filtered
CL1102.Contig1_All	S	351	Filtered	Filtered	9.7947	5.82859
CL1102.Contig1_All	T	350	Filtered	Filtered	9.7947	5.82859
CL1102.Contig1_All	S	343	171.56	191.837	263.846	289.287
CL1102.Contig1_All	S	591	1014.76	913.958	1374.23	1471.82
CL1102.Contig1_All	S	380	440.953	381.38	505.038	604.537
CL1102.Contig1_All	T	379	141.85	Filtered	Filtered	Filtered
CL1102.Contig1_All	S	377	141.85	Filtered	Filtered	Filtered
CL1102.Contig1_All	S	376	141.85	Filtered	Filtered	Filtered
CL1102.Contig1_All	S	380	Filtered	116.028	Filtered	193.741
CL1102.Contig1_All	S	376	Filtered	116.028	Filtered	193.741
CL1102.Contig1_All	S	757	1350.05	1457.62	1746.25	2045.68
CL1102.Contig1_All	S	756	1350.05	1457.62	1746.25	2045.68
CL1102.Contig1_All	S	752	1350.05	1457.62	1746.25	2045.68
CL1102.Contig1_All	S	756	60.7088	35.0065	124.804	117.739
CL1102.Contig1_All	S	752	60.7088	Filtered	124.804	117.739
CL1102.Contig1_All	S	757	Filtered	35.0065	Filtered	Filtered
CL1102.Contig1_All	S	757	7.71244	Filtered	Filtered	Filtered
CL1102.Contig1_All	S	558	499.327	351.726	508.883	596.844
CL1102.Contig1_All	S	557	123.002	157.108	Filtered	232.007
CL1102.Contig1_All	T	276	296.213	Filtered	Filtered	199.66
CL1102.Contig1_All	C	251	296.213	296.368	327.498	199.66
CL1102.Contig1_All	S	271	349.167	737.625	669.176	419.822
CL1102.Contig1_All	S	309	Filtered	Filtered	Filtered	123.819
CL1102.Contig1_All	S	318	Filtered	20.5658	Filtered	Filtered
CL1102.Contig1_All	S	462	Filtered	Filtered	Filtered	329.27
CL1102.Contig1_All	S	426	Filtered	34.8643	Filtered	Filtered
CL1102.Contig1_All	C	650	10.006	11.7637	8.99554	10.919
CL1105.Contig1_All	S	12	Filtered	Filtered	Filtered	5.93051
CL1106.Contig3_All	S	303	13228.6	17007.6	12698.5	8784.7
CL1106.Contig4_All	S	303	13228.6	17007.6	12698.5	8784.7
CL1106.Contig7_All	S	303	13228.6	17007.6	12698.5	8784.7
CL1106.Contig3_All	S	300	Filtered	Filtered	Filtered	533.691
CL1106.Contig4_All	S	300	Filtered	Filtered	Filtered	533.691
CL1106.Contig7_All	S	300	Filtered	Filtered	Filtered	533.691
CL1106.Contig3_All	S	314	220.013	240.595	169.557	205.594
CL1106.Contig4_All	S	314	220.013	240.595	169.557	205.594
CL1106.Contig7_All	S	314	220.013	240.595	169.557	205.594
CL1106.Contig3_All	S	319	88.5592	75.52	Filtered	Filtered
CL1106.Contig4_All	S	319	88.5592	75.52	Filtered	Filtered
CL1106.Contig7_All	S	319	88.5592	75.52	Filtered	Filtered
CL1106.Contig3_All	S	122	91.2432	112.413	49.5287	63.6117
CL1106.Contig4_All	S	122	91.2432	112.413	49.5287	63.6117
CL1106.Contig7_All	S	122	91.2432	112.413	49.5287	63.6117
CL1106.Contig3_All	M	255	33.2986	20.483	9.87776	2.48286
CL1106.Contig4_All	M	255	33.2986	20.483	9.87776	2.48286
CL1106.Contig7_All	M	255	33.2986	20.483	9.87776	2.48286
CL1106.Contig3_All	S	98	11.8023	Filtered	13.3872	10.1468
CL1106.Contig4_All	S	98	11.8023	Filtered	13.3872	10.1468
CL1106.Contig7_All	S	98	11.8023	Filtered	13.3872	10.1468
CL1107.Contig1_All	S	101	Filtered	94.0559	Filtered	Filtered
CL1107.Contig2_All	S	101	Filtered	94.0559	Filtered	Filtered
CL1107.Contig1_All	S	90	Filtered	174.202	195.335	131.745
CL1107.Contig2_All	S	90	Filtered	174.202	195.335	131.745
CL111.Contig5_All	S	68	1202.44	1155.02	598.489	482.43
CL111.Contig5_All	S	486	528.148	542.879	389.117	414.265
CL111.Contig5_All	S	479	528.148	542.879	389.117	414.265
CL111.Contig5_All	S	486	718.034	755.717	594.087	490.48
CL111.Contig5_All	S	479	Filtered	47.686	Filtered	Filtered
CL111.Contig5_All	S	461	154.492	156.522	85.9908	Filtered
CL111.Contig5_All	T	467	Filtered	128.261	Filtered	Filtered
CL111.Contig5_All	S	584	386.395	345.188	300.367	Filtered
CL111.Contig5_All	S	558	46.1696	Filtered	Filtered	Filtered
CL1112.Contig4_All	T	109	99.8224	107.715	76.3548	67.2434
CL1113.Contig2_All	S	56	Filtered	343.562	Filtered	Filtered
CL1113.Contig6_All	S	56	Filtered	343.562	Filtered	Filtered
CL1118.Contig1_All	S	13	Filtered	Filtered	Filtered	49.1845
CL1118.Contig2_All	S	195	10542.4	13367.4	15528.6	15213.9
CL1118.Contig2_All	S	195	Filtered	99.5839	172.234	151.095
CL1118.Contig2_All	S	190	Filtered	99.5839	172.234	151.095
CL1118.Contig2_All	S	388	4729.47	5777.36	9720.73	8600.35
CL1118.Contig2_All	S	386	4729.47	5777.36	9720.73	8600.35
CL1118.Contig2_All	S	388	4702.39	5182.44	6273.3	7980.14
CL1118.Contig2_All	S	386	4702.39	5182.44	6273.3	7980.14
CL1118.Contig2_All	S	384	4702.39	5182.44	6273.3	7980.14
CL1118.Contig2_All	S	340	5568.79	6784.9	Filtered	7144.93
CL1118.Contig2_All	S	340	171.94	934.525	736.038	71.6523
CL1118.Contig2_All	T	337	Filtered	714.287	Filtered	Filtered
CL1118.Contig2_All	S	339	48.207	Filtered	523.7	71.6523
CL1118.Contig2_All	S	332	123.733	220.238	212.338	Filtered
CL1118.Contig2_All	S	340	319.607	220.603	442.81	334.508
CL1118.Contig2_All	S	339	319.607	220.603	386.44	263.702
CL1118.Contig2_All	T	337	319.607	220.603	442.81	334.508
CL1118.Contig2_All	S	332	Filtered	Filtered	56.3708	70.8058
CL1118.Contig2_All	S	332	Filtered	27.611	Filtered	Filtered
CL1118.Contig2_All	S	586	113.951	Filtered	723.464	Filtered
CL1118.Contig2_All	S	582	113.951	Filtered	723.464	Filtered
CL1118.Contig2_All	S	580	113.951	Filtered	723.464	Filtered
CL1118.Contig2_All	S	578	113.951	Filtered	723.464	Filtered
CL1118.Contig2_All	S	574	113.951	Filtered	723.464	Filtered
CL1118.Contig2_All	S	381	271.972	351.802	546.817	459.149
CL1118.Contig2_All	T	379	46.0735	Filtered	112.733	Filtered
CL1118.Contig2_All	S	546	1234.9	1349.89	2031.2	2022.03
CL1118.Contig2_All	S	544	1234.9	1349.89	2031.2	2022.03
CL1118.Contig2_All	S	542	1234.9	1349.89	2031.2	2022.03
CL1118.Contig2_All	S	433	702.958	953.374	1066.11	1664.48
CL1118.Contig2_All	S	431	702.958	953.374	1066.11	1664.48
CL1118.Contig2_All	S	429	702.958	953.374	1066.11	1307.16
CL1118.Contig2_All	S	415	903.539	916.916	1598.08	1410.83
CL1118.Contig2_All	S	413	903.539	916.916	1598.08	1410.83
CL1118.Contig2_All	S	415	79.2015	131.324	155.312	182.849
CL1118.Contig2_All	S	413	79.2015	131.324	155.312	182.849
CL1118.Contig2_All	S	411	79.2015	131.324	155.312	182.849
CL1118.Contig2_All	S	415	Filtered	59.3834	197.979	171.602
CL1118.Contig2_All	S	494	1288.32	1249.67	1539.89	1430.74
CL1118.Contig2_All	S	428	Filtered	Filtered	Filtered	357.317
CL1118.Contig2_All	S	433	Filtered	26.6276	25.3951	45.3436
CL1118.Contig2_All	S	431	Filtered	26.6276	25.3951	45.3436
CL1118.Contig2_All	S	388	Filtered	34.4228	Filtered	115.52
CL1118.Contig2_All	S	465	471.915	Filtered	Filtered	822.213
CL1118.Contig2_All	S	461	471.915	Filtered	Filtered	822.213
CL1118.Contig2_All	T	459	471.915	Filtered	Filtered	822.213
CL1118.Contig2_All	S	384	128.878	230.282	278.92	281.009
CL1118.Contig3_All	S	264	5425.1	6721.97	6364.14	Filtered
CL1118.Contig3_All	S	264	307.696	411.13	372.27	405.153
CL1118.Contig3_All	S	256	114.285	196.464	156.853	173.406
CL1118.Contig3_All	S	263	193.411	214.666	215.418	231.747
CL1122.Contig3_All	S	43	1913.51	2181.05	1977.05	2771.69
CL1122.Contig3_All	S	43	432.864	421.404	489.09	513.78
CL1122.Contig3_All	S	40	432.864	421.404	489.09	513.78
CL1122.Contig3_All	S	1039	1820.28	1136.68	Filtered	1392.2
CL1122.Contig3_All	S	1042	Filtered	Filtered	423.498	Filtered
CL1122.Contig3_All	S	40	Filtered	Filtered	760.125	Filtered
CL1122.Contig3_All	S	12	Filtered	Filtered	34.3395	Filtered
CL1122.Contig3_All	Y	11	8.18199	Filtered	15.1005	Filtered
CL1122.Contig3_All	M	109	8.05385	8.98886	1.78234	7.19321
CL1122.Contig3_All	S	136	Filtered	Filtered	16.9531	Filtered
CL1122.Contig5_All	S	1046	652.002	431.43	222.397	408.778
CL1122.Contig5_All	S	1044	652.002	431.43	222.397	408.778
CL1122.Contig5_All	S	1046	191.116	275.926	162.505	341.453
CL1122.Contig5_All	S	1044	65.4534	Filtered	70.1682	Filtered
CL1122.Contig5_All	T	1033	332.481	138.354	Filtered	410.62
CL1122.Contig5_All	M	114	39.6898	56.3993	76.8236	77.9632
CL1122.Contig5_All	M	102	39.6898	56.3993	76.8236	77.9632
CL1122.Contig5_All	M	114	47.3441	34.8666	52.3143	41.6139
CL1122.Contig5_All	M	102	21.8857	40.7323	54.7298	46.7514
CL1122.Contig5_All	T	1033	51.0551	Filtered	Filtered	Filtered
CL1122.Contig5_All	S	1031	51.0551	Filtered	Filtered	Filtered
CL1122.Contig5_All	S	716	14.6629	Filtered	Filtered	Filtered
CL1124.Contig1_All	S	128	42.8107	48.68	45.505	65.7531
CL1124.Contig2_All	S	128	111.363	114.635	111.733	148.401
CL1124.Contig3_All	C	5	11.2842	7.72326	Filtered	Filtered
CL1131.Contig4_All	M	201	44.7578	19.0748	37.6981	40.0843
CL1131.Contig4_All	C	12	26.2287	30.2598	15.4811	Filtered
CL1131.Contig4_All	S	62	27.6887	Filtered	Filtered	Filtered
CL1136.Contig3_All	S	374	50.4196	526.905	Filtered	73.1593
CL1136.Contig4_All	S	374	50.4196	526.905	Filtered	73.1593
CL1136.Contig5_All	S	388	50.4196	526.905	Filtered	73.1593
CL1136.Contig7_All	S	388	50.4196	526.905	Filtered	73.1593
CL1136.Contig8_All	S	372	50.4196	526.905	Filtered	73.1593
Unigene6155_All	S	372	50.4196	526.905	Filtered	73.1593
CL1136.Contig3_All	S	343	169.141	Filtered	114.595	56.8306
CL1136.Contig4_All	S	343	169.141	Filtered	114.595	56.8306
CL1136.Contig5_All	S	357	169.141	Filtered	114.595	56.8306
CL1136.Contig7_All	S	357	169.141	Filtered	114.595	56.8306
CL1136.Contig8_All	S	341	169.141	Filtered	114.595	56.8306
Unigene6155_All	S	341	169.141	Filtered	114.595	56.8306
CL1136.Contig3_All	M	342	50.9979	Filtered	Filtered	56.8306
CL1136.Contig4_All	M	342	50.9979	Filtered	Filtered	56.8306
CL1136.Contig5_All	M	356	50.9979	Filtered	Filtered	56.8306
CL1136.Contig7_All	M	356	50.9979	Filtered	Filtered	56.8306
CL1136.Contig8_All	M	340	50.9979	Filtered	Filtered	56.8306
Unigene6155_All	M	340	50.9979	Filtered	Filtered	56.8306
CL1136.Contig3_All	C	231	Filtered	39.8467	Filtered	Filtered
CL1136.Contig3_All	S	224	Filtered	39.8467	Filtered	Filtered
CL1136.Contig4_All	C	231	Filtered	39.8467	Filtered	Filtered
CL1136.Contig4_All	S	224	Filtered	39.8467	Filtered	Filtered
CL1136.Contig5_All	C	245	Filtered	39.8467	Filtered	Filtered
CL1136.Contig5_All	S	238	Filtered	39.8467	Filtered	Filtered
CL1136.Contig7_All	C	245	Filtered	39.8467	Filtered	Filtered
CL1136.Contig7_All	S	238	Filtered	39.8467	Filtered	Filtered
CL1136.Contig8_All	C	229	Filtered	39.8467	Filtered	Filtered
CL1136.Contig8_All	S	222	Filtered	39.8467	Filtered	Filtered
Unigene6155_All	C	229	Filtered	39.8467	Filtered	Filtered
Unigene6155_All	S	222	Filtered	39.8467	Filtered	Filtered
CL1152.Contig2_All	S	464	48.3082	49.9391	40.9981	Filtered
CL1152.Contig2_All	C	340	16.6464	9.4196	Filtered	14.7861
CL1159.Contig1_All	T	189	14.8262	11.4802	12.4707	5.72464
CL1159.Contig2_All	T	163	14.8262	11.4802	12.4707	5.72464
CL1164.Contig1_All	S	283	Filtered	304.546	Filtered	Filtered
CL1164.Contig2_All	S	283	Filtered	304.546	Filtered	Filtered
CL1164.Contig1_All	S	285	268.472	308.33	Filtered	Filtered
CL1164.Contig2_All	S	285	268.472	308.33	Filtered	Filtered
CL1164.Contig1_All	S	307	297.642	320.272	204.105	232.807
CL1164.Contig2_All	S	307	297.642	320.272	204.105	232.807
CL1164.Contig1_All	S	318	234.943	228.366	48.6213	156.391
CL1164.Contig2_All	S	318	234.943	228.366	48.6213	156.391
CL1164.Contig1_All	S	316	106.104	129.325	107.373	88.4084
CL1164.Contig2_All	S	316	106.104	129.325	107.373	88.4084
CL1164.Contig1_All	M	314	45.322	70.6228	56.8878	48.4841
CL1164.Contig2_All	M	314	45.322	70.6228	56.8878	48.4841
CL1164.Contig1_All	S	318	36.9596	35.2778	45.2198	18.2305
CL1164.Contig1_All	S	316	64.3742	59.1322	55.8016	26.1022
CL1164.Contig2_All	S	318	36.9596	35.2778	45.2198	18.2305
CL1164.Contig2_All	S	316	64.3742	59.1322	55.8016	26.1022
CL1164.Contig1_All	S	307	27.4145	23.8544	10.5818	7.8717
CL1164.Contig2_All	S	307	27.4145	23.8544	10.5818	7.8717
CL1164.Contig1_All	S	332	626.915	669.779	534.658	516.28
CL1164.Contig1_All	S	329	626.915	669.779	534.658	516.28
CL1164.Contig1_All	S	324	626.915	669.779	534.658	516.28
CL1164.Contig2_All	S	332	626.915	669.779	534.658	516.28
CL1164.Contig2_All	S	329	626.915	669.779	534.658	516.28
CL1164.Contig2_All	S	324	626.915	669.779	534.658	516.28
CL1164.Contig1_All	S	332	126.936	165.495	235.138	210.319
CL1164.Contig1_All	S	329	126.936	165.495	235.138	210.319
CL1164.Contig2_All	S	332	126.936	165.495	235.138	210.319
CL1164.Contig2_All	S	329	126.936	165.495	235.138	210.319
CL1164.Contig1_All	S	265	39.1113	Filtered	242.605	Filtered
CL1164.Contig2_All	S	265	39.1113	Filtered	242.605	Filtered
CL1164.Contig1_All	S	274	194.985	215.25	71.3791	80.395
CL1164.Contig2_All	S	274	194.985	215.25	71.3791	80.395
CL1171.Contig3_All	S	66	101.291	102.335	70.4583	61.7227
CL1176.Contig2_All	S	475	90.371	77.3275	97.4944	119.595
CL1176.Contig2_All	M	492	64.1962	43.6392	43.8808	36.9409
CL1179.Contig1_All	S	365	1018.81	1005.24	1189.06	1133.18
CL1179.Contig2_All	S	333	1018.81	1005.24	1189.06	1133.18
CL1179.Contig3_All	S	327	1018.81	1005.24	1189.06	1133.18
CL1179.Contig4_All	S	307	1018.81	1005.24	1189.06	1133.18
CL1179.Contig1_All	M	361	68.4878	105.178	237.947	162.959
CL1179.Contig2_All	M	329	68.4878	105.178	237.947	162.959
CL1179.Contig3_All	M	323	68.4878	105.178	237.947	162.959
CL1179.Contig4_All	M	303	68.4878	105.178	237.947	162.959
CL1179.Contig1_All	S	148	Filtered	Filtered	Filtered	123.707
CL1179.Contig2_All	S	116	Filtered	Filtered	Filtered	123.707
CL1179.Contig3_All	S	110	Filtered	Filtered	Filtered	123.707
CL1179.Contig4_All	S	90	Filtered	Filtered	Filtered	123.707
CL1184.Contig9_All	S	143	54.0417	Filtered	Filtered	Filtered
CL1184.Contig9_All	S	374	Filtered	Filtered	42.0812	Filtered
CL1184.Contig9_All	S	308	85.1305	101.442	51.5341	77.9789
CL1187.Contig13_All	T	170	Filtered	Filtered	Filtered	61.0436
CL1187.Contig13_All	C	168	Filtered	Filtered	Filtered	61.0436
CL1187.Contig15_All	T	170	Filtered	Filtered	Filtered	61.0436
CL1187.Contig15_All	C	168	Filtered	Filtered	Filtered	61.0436
CL1187.Contig7_All	T	170	Filtered	Filtered	Filtered	61.0436
CL1187.Contig7_All	C	168	Filtered	Filtered	Filtered	61.0436
CL1195.Contig2_All	S	297	Filtered	17.6978	47.7567	Filtered
CL1199.Contig1_All	T	177	15766.9	22195.1	28986.5	25999.9
CL1199.Contig2_All	T	88	15766.9	22195.1	28986.5	25999.9
CL12.Contig1_All	S	152	13.7877	Filtered	Filtered	Filtered
Unigene13410_All	S	152	13.7877	Filtered	Filtered	Filtered
CL1204.Contig2_All	S	362	121.126	Filtered	46.3605	Filtered
CL1206.Contig1_All	Y	493	59.2423	Filtered	86.8246	Filtered
CL1206.Contig2_All	Y	493	59.2423	Filtered	86.8246	Filtered
CL1206.Contig1_All	S	66	Filtered	19.6554	Filtered	25.078
CL1206.Contig2_All	S	66	Filtered	19.6554	Filtered	25.078
CL1208.Contig11_All	S	704	940.664	841.742	685.341	568.565
CL1208.Contig11_All	C	698	Filtered	Filtered	Filtered	148.313
CL1208.Contig11_All	S	695	Filtered	Filtered	Filtered	148.313
CL1208.Contig11_All	S	313	426.461	344.304	26.9597	Filtered
CL1208.Contig11_All	T	287	Filtered	60.621	Filtered	61.0109
CL1208.Contig2_All	S	214	3527.28	3048.19	3232.02	3544.55
CL1209.Contig1_All	S	477	1000.72	1066.5	1056.48	1220.93
CL1209.Contig2_All	S	477	1000.72	1066.5	1056.48	1220.93
CL1209.Contig3_All	S	477	1000.72	1066.5	1056.48	1220.93
CL1209.Contig1_All	S	437	259.26	344.588	239.527	327.817
CL1209.Contig2_All	S	437	259.26	344.588	239.527	327.817
CL1209.Contig3_All	S	437	259.26	344.588	239.527	327.817
CL1209.Contig1_All	S	455	212.85	220.429	225.657	217.951
CL1209.Contig2_All	S	455	212.85	220.429	225.657	217.951
CL1209.Contig3_All	S	455	212.85	220.429	225.657	217.951
CL1209.Contig1_All	S	410	52.2792	47.309	48.2451	30.6992
CL1209.Contig2_All	S	410	52.2792	47.309	48.2451	30.6992
CL1209.Contig3_All	S	410	52.2792	47.309	48.2451	30.6992
CL1213.Contig1_All	C	230	6711.63	21551.6	3020.2	5740.77
CL1213.Contig1_All	C	219	6711.63	21551.6	3020.2	5740.77
CL1213.Contig1_All	M	364	20.9849	73.5994	18.8765	20.528
CL1213.Contig2_All	C	82	85.2695	150.937	32.2395	84.9594
CL1213.Contig2_All	C	65	30.1892	169.106	37.7085	68.1412
CL1213.Contig3_All	M	65	506.298	785.385	110.643	333.254
CL1213.Contig3_All	C	219	1283.32	1527.48	212.342	486.772
CL1213.Contig3_All	S	360	44.585	108.036	Filtered	35.0779
CL1213.Contig3_All	S	365	25.0115	Filtered	44.8433	Filtered
CL1213.Contig3_All	S	358	Filtered	Filtered	Filtered	35.3811
CL1213.Contig3_All	S	335	Filtered	Filtered	Filtered	230.72
CL1213.Contig3_All	S	515	15.466	Filtered	Filtered	Filtered
CL1213.Contig3_All	C	77	574.983	615.592	533.678	107.331
CL1215.Contig3_All	S	504	91.6802	79.0066	60.3902	139.931
CL1215.Contig4_All	S	494	91.6802	79.0066	60.3902	139.931
CL1218.Contig2_All	S	18	476.029	521.492	346.311	526.871
CL1218.Contig2_All	M	17	204.848	248.938	Filtered	250.718
CL1223.Contig2_All	T	225	48.2629	54.087	Filtered	46.2825
CL1223.Contig4_All	T	176	48.2629	54.087	Filtered	46.2825
CL6527.Contig1_All	T	209	48.2629	54.087	Filtered	46.2825
Unigene12245_All	T	206	48.2629	54.087	Filtered	46.2825
CL1225.Contig1_All	S	24	245.027	Filtered	487.454	1230.59
CL1225.Contig1_All	S	20	245.027	Filtered	487.454	1230.59
CL1225.Contig1_All	S	19	245.027	Filtered	487.454	1230.59
CL1225.Contig2_All	S	24	245.027	Filtered	487.454	1230.59
CL1225.Contig2_All	S	20	245.027	Filtered	487.454	1230.59
CL1225.Contig2_All	S	19	245.027	Filtered	487.454	1230.59
CL1225.Contig1_All	M	1	50.0745	56.1097	644.709	292.616
CL1225.Contig2_All	M	1	50.0745	56.1097	644.709	292.616
CL1225.Contig1_All	S	20	50.0745	56.1097	157.255	Filtered
CL1225.Contig1_All	S	19	50.0745	56.1097	157.255	Filtered
CL1225.Contig2_All	S	20	50.0745	56.1097	157.255	Filtered
CL1225.Contig2_All	S	19	50.0745	56.1097	157.255	Filtered
CL1227.Contig1_All	T	512	21.5861	26.5954	15.3094	24.9683
CL1227.Contig4_All	S	516	5595.24	5260.95	8345.58	7799.89
CL1227.Contig4_All	S	520	1071.64	952.058	Filtered	823.336
CL1227.Contig4_All	S	520	551.195	562.378	683.583	529.436
CL1227.Contig4_All	S	516	551.195	562.378	683.583	529.436
CL1231.Contig1_All	S	55	9790.13	6523.88	14270	3161.94
CL1231.Contig2_All	S	55	9790.13	6523.88	14270	3161.94
CL1231.Contig1_All	S	61	57.264	39.3144	57.3981	22.1199
CL1231.Contig1_All	S	55	74.5531	55.4733	57.3981	22.1199
CL1231.Contig2_All	S	61	57.264	39.3144	57.3981	22.1199
CL1231.Contig2_All	S	55	74.5531	55.4733	57.3981	22.1199
CL1231.Contig1_All	S	38	17.2891	16.1588	Filtered	Filtered
CL1231.Contig2_All	S	38	17.2891	16.1588	Filtered	Filtered
CL1231.Contig1_All	S	359	728.871	Filtered	555.546	Filtered
CL1231.Contig2_All	S	359	728.871	Filtered	555.546	Filtered
CL1231.Contig1_All	S	612	60.5629	Filtered	Filtered	Filtered
CL1231.Contig2_All	S	612	60.5629	Filtered	Filtered	Filtered
CL124.Contig1_All	S	11	78.0624	72.727	72.3452	108.665
CL124.Contig2_All	S	66	317.598	337.084	Filtered	Filtered
CL1240.Contig1_All	S	11	Filtered	Filtered	Filtered	2426.97
CL1240.Contig1_All	S	10	Filtered	Filtered	Filtered	2426.97
CL1240.Contig1_All	S	4	Filtered	Filtered	Filtered	2426.97
CL1240.Contig1_All	S	4	162.081	123.974	169.786	137.809
CL1240.Contig1_All	M	1	77.846	72.1179	66.7501	68.8655
CL1242.Contig1_All	S	890	11.3761	Filtered	Filtered	16.1637
CL1247.Contig1_All	S	12	76.968	62.9669	6.19334	107.411
CL125.Contig10_All	S	209	735.9	1465.22	241.123	846.817
CL125.Contig3_All	S	509	735.9	1465.22	241.123	846.817
CL1257.Contig2_All	S	293	906.171	896.354	396.511	408.713
CL1257.Contig2_All	S	295	434.473	495.659	219.422	236.18
CL1257.Contig2_All	S	293	434.473	495.659	219.422	236.18
CL1257.Contig2_All	S	292	434.473	495.659	219.422	236.18
CL1257.Contig2_All	S	293	Filtered	18.3332	Filtered	Filtered
CL1257.Contig2_All	S	292	Filtered	18.3332	Filtered	Filtered
CL1257.Contig2_All	S	292	Filtered	Filtered	9.83021	Filtered
CL1257.Contig2_All	S	378	937.988	844.031	1086.39	1552.24
CL1257.Contig2_All	S	378	357.567	Filtered	515.434	482.981
CL1257.Contig2_All	S	376	357.567	Filtered	515.434	482.981
CL1257.Contig2_All	S	37	349.138	97.5377	278.067	186.894
CL1257.Contig2_All	S	110	131.534	Filtered	Filtered	Filtered
CL1257.Contig2_All	S	398	19.0084	Filtered	18.315	25.2351
CL1259.Contig2_All	S	189	Filtered	96.7515	43.5144	18.4911
CL1259.Contig2_All	S	181	20.3955	16.9095	9.61716	17.8269
CL1259.Contig5_All	Y	222	Filtered	Filtered	8.95728	12.7665
CL1259.Contig5_All	S	224	Filtered	15.5453	Filtered	8.36572
CL1262.Contig1_All	S	7	Filtered	60.0786	52.172	35.3781
CL1262.Contig2_All	S	436	Filtered	60.0786	52.172	35.3781
CL1269.Contig1_All	S	483	921.874	1080.7	Filtered	1077.6
CL1269.Contig1_All	S	482	149.142	Filtered	Filtered	Filtered
CL1269.Contig1_All	S	421	1307.36	1468.53	1108.67	1472.76
CL1269.Contig1_All	T	86	1130.06	1044.12	1173.29	897.005
CL1269.Contig1_All	S	539	233.446	234.003	206.797	201.577
CL1269.Contig1_All	S	528	233.446	234.003	206.797	201.577
CL1269.Contig1_All	S	539	212.814	195.492	175.298	321.673
CL1269.Contig1_All	M	531	86.3707	106.538	Filtered	159.966
CL1269.Contig1_All	S	539	95.0377	111.895	131.186	281.216
CL1269.Contig1_All	S	530	95.0377	111.895	131.186	281.216
CL1269.Contig1_All	S	528	65.1273	111.895	70.512	242.6
CL1269.Contig1_All	S	897	121.767	87.8703	112.677	91.2652
CL1269.Contig1_All	S	899	Filtered	78.3038	38.9825	Filtered
CL1269.Contig1_All	S	116	269.519	198.471	236.587	302.512
CL1269.Contig1_All	S	111	269.519	198.471	236.587	302.512
CL1269.Contig1_All	S	116	116.504	114.989	154.823	509.723
CL1269.Contig1_All	S	442	54.3167	9.1443	Filtered	10.8985
CL1269.Contig1_All	S	744	Filtered	10.0012	9.1163	6.33355
CL1269.Contig1_All	S	557	112.419	84.4304	60.4016	Filtered
CL1269.Contig1_All	S	526	95.0377	Filtered	131.186	133.18
CL1269.Contig1_All	T	387	16.1603	94.725	116.749	Filtered
CL1271.Contig1_All	S	43	Filtered	24.5273	Filtered	Filtered
CL1271.Contig2_All	S	45	Filtered	24.5273	Filtered	Filtered
CL1272.Contig1_All	C	31	362.497	330.115	564.72	514.26
CL1272.Contig1_All	C	28	362.497	330.115	564.72	514.26
CL1272.Contig1_All	S	21	362.497	330.115	485.38	514.26
CL1272.Contig2_All	C	62	362.497	330.115	564.72	514.26
CL1272.Contig2_All	C	59	362.497	330.115	564.72	514.26
CL1272.Contig2_All	S	52	362.497	330.115	485.38	514.26
CL1272.Contig1_All	S	22	Filtered	Filtered	79.3407	Filtered
CL1272.Contig2_All	S	53	Filtered	Filtered	79.3407	Filtered
CL1273.Contig1_All	S	224	197.859	194.077	180.747	199.856
CL1273.Contig1_All	S	222	197.859	194.077	180.747	199.856
CL1273.Contig2_All	S	224	197.859	194.077	180.747	199.856
CL1273.Contig2_All	S	222	197.859	194.077	180.747	199.856
CL1273.Contig1_All	S	222	Filtered	Filtered	14.2899	Filtered
CL1273.Contig2_All	S	222	Filtered	Filtered	14.2899	Filtered
CL1274.Contig1_All	S	162	3422.23	3772.95	3644.71	3562.89
CL1274.Contig4_All	S	162	3422.23	3772.95	3644.71	3562.89
CL1274.Contig1_All	T	541	Filtered	Filtered	66.4005	Filtered
CL1274.Contig4_All	T	541	Filtered	Filtered	66.4005	Filtered
CL1274.Contig1_All	S	274	30.0641	23.4548	Filtered	Filtered
CL1274.Contig4_All	S	274	30.0641	23.4548	Filtered	Filtered
CL1274.Contig1_All	M	222	12.3096	7.49553	8.16684	17.0638
CL1274.Contig4_All	M	222	12.3096	7.49553	8.16684	17.0638
CL1274.Contig1_All	C	87	14.5581	10.9652	21.0669	22.3248
CL1274.Contig4_All	C	87	14.5581	10.9652	21.0669	22.3248
CL1277.Contig1_All	T	286	Filtered	Filtered	Filtered	80.3522
CL1277.Contig1_All	S	290	Filtered	193.987	Filtered	Filtered
CL1277.Contig1_All	T	291	153.094	Filtered	68.9562	87.0786
CL1277.Contig1_All	S	70	67.6228	98.3085	45.3696	49.4616
CL1278.Contig4_All	S	349	8116.96	7691.32	8032.16	6425.86
CL1278.Contig4_All	S	353	1390.72	1327.46	1419.27	1405.21
CL1278.Contig4_All	S	349	1390.72	1327.46	1419.27	1405.21
CL1278.Contig4_All	S	365	1123.95	1081.07	1151.48	897.521
CL1278.Contig4_All	S	365	2705.54	1863.58	144.976	311.196
CL1278.Contig4_All	S	363	2705.54	1863.58	144.976	311.196
CL1279.Contig1_All	T	67	Filtered	Filtered	Filtered	38.1038
CL128.Contig1_All	Y	636	32.2829	Filtered	37.9702	34.6583
CL128.Contig2_All	Y	636	32.2829	Filtered	37.9702	34.6583
CL128.Contig1_All	S	634	33.3017	Filtered	Filtered	Filtered
CL128.Contig2_All	S	634	33.3017	Filtered	Filtered	Filtered
CL128.Contig1_All	S	637	Filtered	Filtered	70.498	Filtered
CL128.Contig2_All	S	637	Filtered	Filtered	70.498	Filtered
CL1280.Contig1_All	S	210	2890.84	2821.58	3819.11	3562.18
CL1280.Contig1_All	S	206	2890.84	2821.58	3819.11	3562.18
CL1280.Contig2_All	S	210	2890.84	2821.58	3819.11	3562.18
CL1280.Contig2_All	S	206	2890.84	2821.58	3819.11	3562.18
CL1280.Contig3_All	S	210	2890.84	2821.58	3819.11	3562.18
CL1280.Contig3_All	S	206	2890.84	2821.58	3819.11	3562.18
CL1280.Contig1_All	S	325	488.135	454.165	786.648	700.888
CL1280.Contig1_All	M	323	488.135	454.165	524.177	423.385
CL1280.Contig2_All	S	325	488.135	454.165	786.648	700.888
CL1280.Contig2_All	M	323	488.135	454.165	524.177	423.385
CL1280.Contig3_All	S	325	488.135	454.165	786.648	700.888
CL1280.Contig3_All	M	323	488.135	454.165	524.177	423.385
CL1280.Contig1_All	S	303	459.115	399.585	275.541	515.517
CL1280.Contig2_All	S	303	459.115	399.585	275.541	515.517
CL1280.Contig3_All	S	303	459.115	399.585	275.541	515.517
CL1280.Contig1_All	S	111	471.401	258.771	323.943	273.412
CL1280.Contig2_All	S	111	471.401	258.771	323.943	273.412
CL1280.Contig3_All	S	111	471.401	258.771	323.943	273.412
CL1282.Contig1_All	S	60	62.2097	Filtered	Filtered	125.458
CL1282.Contig2_All	S	60	62.2097	Filtered	Filtered	125.458
CL1289.Contig1_All	C	356	102.015	51.5029	51.7935	64.102
CL1289.Contig1_All	S	236	Filtered	Filtered	32.5746	Filtered
CL1289.Contig1_All	C	233	21.132	30.5107	59.7012	42.9338
CL1289.Contig1_All	C	230	21.132	30.5107	59.7012	42.9338
CL1289.Contig1_All	T	232	21.132	30.5107	27.1266	42.9338
CL1290.Contig1_All	M	271	94.7639	Filtered	136.707	Filtered
CL1290.Contig1_All	S	259	94.7639	Filtered	178.962	Filtered
CL1290.Contig1_All	Y	264	Filtered	Filtered	Filtered	12.6891
CL1293.Contig3_All	S	63	2191.38	2426.09	2745.2	2847.14
CL1293.Contig3_All	S	56	2191.38	2426.09	2745.2	2847.14
CL1293.Contig3_All	S	63	779.16	822.931	783.709	698.906
CL1293.Contig3_All	S	56	43.3971	Filtered	Filtered	Filtered
CL1293.Contig3_All	S	75	961.436	Filtered	Filtered	Filtered
CL1293.Contig3_All	T	72	1557.67	567.544	476.32	541.344
CL1293.Contig3_All	S	75	845.606	Filtered	Filtered	647.686
CL1293.Contig3_All	S	76	Filtered	Filtered	662.124	Filtered
CL1293.Contig3_All	T	72	451.747	422.922	701.029	591.877
CL1293.Contig3_All	S	38	2840.43	2321.12	2128.93	1891.4
CL1293.Contig3_All	S	48	536.807	558.84	Filtered	519.211
CL1293.Contig3_All	S	43	536.807	558.84	Filtered	519.211
CL1293.Contig3_All	S	43	Filtered	Filtered	340.615	386.105
CL1293.Contig3_All	S	48	Filtered	Filtered	Filtered	141.87
CL1293.Contig3_All	T	49	Filtered	112.441	107.141	Filtered
CL1293.Contig3_All	S	45	75.7463	80.6249	75.0501	64.9362
CL1293.Contig3_All	S	75	1133.43	1106.86	Filtered	Filtered
CL1293.Contig3_All	T	72	1133.43	1106.86	Filtered	Filtered
CL1293.Contig3_All	S	68	1133.43	1106.86	Filtered	Filtered
CL1293.Contig3_All	S	68	596.233	567.544	476.32	541.344
CL1293.Contig3_All	S	13	1641.22	1862.98	902.266	1005.04
CL1293.Contig3_All	C	12	1694.33	2003.35	944.284	1005.04
CL1293.Contig3_All	S	10	1641.22	1862.98	902.266	1005.04
CL1293.Contig3_All	M	17	155.906	234.443	142.109	143.949
CL1293.Contig3_All	S	10	53.1189	106.805	42.0189	Filtered
CL1293.Contig3_All	S	549	124.573	Filtered	139.452	108.056
CL1295.Contig1_All	S	355	81.0914	50.9119	66.2695	63.542
CL1296.Contig3_All	S	46	76.4477	Filtered	Filtered	Filtered
CL1296.Contig3_All	S	42	Filtered	Filtered	67.287	66.1533
CL1296.Contig3_All	S	68	13.6452	19.8161	15.9976	Filtered
CL1296.Contig3_All	S	76	11.4532	Filtered	Filtered	Filtered
CL1298.Contig1_All	S	90	67.0506	Filtered	115.52	Filtered
CL1298.Contig3_All	S	96	67.0506	Filtered	115.52	Filtered
CL1298.Contig4_All	S	90	67.0506	Filtered	115.52	Filtered
CL1298.Contig5_All	S	105	67.0506	Filtered	115.52	Filtered
CL13.Contig1_All	M	98	5188.17	5083.48	4853.19	4402.29
CL13.Contig1_All	S	93	8439.07	7357.57	7343.29	6829.79
CL13.Contig1_All	S	143	661.891	592.012	360.63	369.145
CL13.Contig1_All	T	116	Filtered	Filtered	157.91	Filtered
CL13.Contig1_All	S	136	Filtered	284.461	Filtered	96.7814
CL13.Contig1_All	S	137	277.235	94.745	217.799	Filtered
CL13.Contig1_All	S	19	30.0615	43.8023	Filtered	32.0537
CL13.Contig1_All	S	124	155.414	Filtered	96.6026	Filtered
CL1303.Contig1_All	S	275	78.6766	75.4169	62.2313	90.0296
CL131.Contig1_All	T	194	170.692	184.659	182.329	164.689
CL131.Contig1_All	S	191	170.692	184.659	182.329	164.689
CL131.Contig2_All	T	194	170.692	184.659	182.329	164.689
CL131.Contig2_All	S	191	170.692	184.659	182.329	164.689
CL1317.Contig1_All	Y	176	299.228	319.859	345.313	332.435
CL1317.Contig1_All	M	173	299.228	319.859	345.313	332.435
CL1317.Contig2_All	Y	213	299.228	319.859	345.313	332.435
CL1317.Contig2_All	M	210	299.228	319.859	345.313	332.435
CL1317.Contig3_All	Y	71	299.228	319.859	345.313	332.435
CL1317.Contig3_All	M	68	299.228	319.859	345.313	332.435
CL1317.Contig1_All	S	178	Filtered	Filtered	Filtered	70.3808
CL1317.Contig2_All	S	215	Filtered	Filtered	Filtered	70.3808
CL1317.Contig3_All	S	73	Filtered	Filtered	Filtered	70.3808
CL1317.Contig1_All	T	191	117.942	151.836	127.957	199.406
CL1317.Contig2_All	T	228	117.942	151.836	127.957	199.406
CL1317.Contig3_All	T	86	117.942	151.836	127.957	199.406
CL1322.Contig1_All	S	172	Filtered	Filtered	Filtered	144.325
CL1322.Contig3_All	S	172	Filtered	Filtered	Filtered	144.325
CL1322.Contig1_All	T	201	58.8431	37.5817	128.894	159.699
CL1322.Contig3_All	T	201	58.8431	37.5817	128.894	159.699
CL1322.Contig2_All	S	217	427.201	325.468	359.351	299.707
CL1322.Contig2_All	S	162	123.26	Filtered	97.1075	Filtered
CL1322.Contig2_All	T	251	Filtered	235.019	364.484	Filtered
CL1326.Contig1_All	T	280	38.1573	Filtered	21.6957	Filtered
CL1326.Contig2_All	T	270	38.1573	Filtered	21.6957	Filtered
CL1334.Contig1_All	S	8	1387.87	1153.47	1779.33	1789.27
CL1343.Contig1_All	S	284	Filtered	5.28301	Filtered	14.2196
CL1343.Contig2_All	S	284	Filtered	5.28301	Filtered	14.2196
CL1343.Contig3_All	S	284	Filtered	5.28301	Filtered	14.2196
CL1343.Contig4_All	S	284	Filtered	5.28301	Filtered	14.2196
CL1344.Contig3_All	S	638	83.273	103.292	Filtered	Filtered
CL1344.Contig4_All	S	271	462.512	434.244	484.149	557.054
CL1344.Contig4_All	S	271	196.252	Filtered	Filtered	Filtered
CL1344.Contig4_All	S	269	196.252	Filtered	Filtered	Filtered
CL1344.Contig4_All	S	331	412.714	464.715	494.987	441.163
CL1344.Contig4_All	S	327	412.714	464.715	494.987	441.163
CL1344.Contig4_All	S	327	333.816	379.555	262	260.765
CL1344.Contig4_All	S	331	30.8454	Filtered	Filtered	Filtered
CL1344.Contig4_All	S	160	Filtered	Filtered	Filtered	134.067
CL1344.Contig4_All	T	344	3.18734	Filtered	Filtered	Filtered
CL1344.Contig4_All	S	627	38.8894	43.6819	67.2604	Filtered
CL1344.Contig7_All	S	53	832.186	835.435	930.242	863.907
CL1344.Contig7_All	S	101	443.87	11.0162	546.84	426.839
CL1344.Contig7_All	S	1005	Filtered	Filtered	Filtered	28.7406
CL1344.Contig7_All	S	113	100.157	111.158	Filtered	Filtered
CL1344.Contig7_All	S	388	54.939	67.9266	61.428	72.246
CL1344.Contig7_All	T	653	14.9751	Filtered	Filtered	Filtered
CL1345.Contig1_All	M	239	143.476	164.545	109.63	132.291
CL1345.Contig3_All	S	266	181.565	158.82	101.609	80.1529
CL1345.Contig3_All	T	248	45.4385	Filtered	33.0164	Filtered
CL1345.Contig5_All	S	248	7119.1	7737.23	4237.59	4047.98
CL1345.Contig5_All	M	244	3554.59	4286.06	2247.57	2011.79
CL1351.Contig4_All	S	10	240.781	226.776	274.036	191.675
CL1351.Contig5_All	S	10	240.781	226.776	274.036	191.675
CL1359.Contig7_All	S	335	1248.4	1414.17	Filtered	934.737
CL1359.Contig7_All	S	335	747.403	717.194	658.37	615.097
CL1359.Contig7_All	S	332	747.403	717.194	658.37	615.097
CL1359.Contig7_All	S	332	74.269	84.0658	76.729	Filtered
CL1359.Contig7_All	S	11	30.0678	34.5904	4.52764	11.8776
CL1361.Contig2_All	S	137	49.0348	27.7816	43.9858	41.3534
CL1361.Contig2_All	C	135	49.0348	27.7816	43.9858	41.3534
CL1371.Contig1_All	M	91	98.203	99.4324	51.2936	Filtered
CL1371.Contig1_All	S	90	98.203	200.145	99.408	Filtered
CL1371.Contig1_All	S	712	31.0282	24.9558	9.47854	11.6973
CL1373.Contig1_All	S	17	939.017	886.114	900.368	740.07
CL1373.Contig2_All	S	17	939.017	886.114	900.368	740.07
CL1373.Contig1_All	T	84	8.21694	15.0787	38.8474	24.4317
CL1373.Contig2_All	T	84	8.21694	15.0787	38.8474	24.4317
CL1382.Contig1_All	S	406	40811.7	43229.5	39335.1	38910.6
CL1382.Contig1_All	S	405	40811.7	43229.5	39335.1	38910.6
CL1382.Contig1_All	S	406	105.309	Filtered	2208.64	2434.17
CL1382.Contig1_All	S	505	624.703	672.081	425.086	468.15
CL1382.Contig1_All	S	444	13.7473	12.5006	15.4649	17.2276
CL1384.Contig1_All	S	16	1.2333	Filtered	Filtered	Filtered
CL1384.Contig2_All	S	16	1.2333	Filtered	Filtered	Filtered
CL1385.Contig2_All	C	479	51.2752	34.1983	46.6359	40.1095
Unigene7544_All	C	399	51.2752	34.1983	46.6359	40.1095
CL1387.Contig1_All	S	271	Filtered	94.818	140.907	Filtered
CL1387.Contig1_All	S	275	Filtered	Filtered	101.055	Filtered
CL1387.Contig1_All	S	456	Filtered	Filtered	53.3358	35.4734
CL1387.Contig1_All	S	329	Filtered	Filtered	Filtered	22.661
CL1388.Contig1_All	S	217	44.7755	Filtered	Filtered	Filtered
CL1388.Contig2_All	S	217	44.7755	Filtered	Filtered	Filtered
CL1393.Contig1_All	T	55	8154.42	7020.93	17486.6	17529.5
CL1393.Contig1_All	S	59	Filtered	115.071	Filtered	Filtered
CL1393.Contig1_All	S	69	70.1085	88.0707	Filtered	Filtered
CL1393.Contig1_All	M	164	626.808	289.642	336.74	418.059
CL1393.Contig1_All	S	76	646.532	521.828	Filtered	Filtered
CL1393.Contig1_All	C	75	700.488	564.209	79.9918	60.2808
CL1393.Contig1_All	T	310	23.531	36.9097	47.3505	17.6138
CL1393.Contig1_All	C	296	44.383	27.8248	41.3631	34.4744
CL1393.Contig1_All	C	293	44.383	27.8248	41.3631	34.4744
CL1393.Contig1_All	M	141	2.66547	5.60159	30.3769	30.3523
CL1393.Contig3_All	C	168	740.662	346.529	392.692	429.87
CL1393.Contig3_All	M	161	247.684	122.075	210.539	212.415
CL1393.Contig3_All	S	312	Filtered	Filtered	111.376	Filtered
CL1393.Contig3_All	C	293	99.1312	48.8329	59.6766	53.4399
CL1393.Contig3_All	C	290	99.1312	48.8329	59.6766	53.4399
CL1396.Contig2_All	S	426	202.302	161.866	214.772	151.965
CL1396.Contig2_All	T	625	Filtered	122.596	Filtered	Filtered
CL1399.Contig1_All	S	154	2753.79	2401.34	4308.42	4080.88
CL1399.Contig1_All	S	296	Filtered	Filtered	495.157	736.456
CL1399.Contig1_All	S	265	63.4236	74.5612	Filtered	Filtered
CL1399.Contig1_All	S	267	Filtered	Filtered	66.9224	60.7971
CL1399.Contig1_All	S	223	171.446	199.668	142.327	148.188
CL1399.Contig1_All	M	60	Filtered	107.52	Filtered	Filtered
CL1399.Contig1_All	S	378	Filtered	16.1109	Filtered	Filtered
CL1399.Contig2_All	S	174	8123.05	6683.38	Filtered	5375.67
CL1399.Contig2_All	S	315	1356.8	1380.26	1012.88	918.946
CL1399.Contig2_All	S	318	807.466	Filtered	Filtered	Filtered
CL1399.Contig2_All	S	136	478.059	Filtered	Filtered	Filtered
CL1399.Contig2_All	T	140	Filtered	Filtered	Filtered	71.9657
CL1399.Contig2_All	S	244	Filtered	Filtered	Filtered	105.42
CL1399.Contig2_All	T	246	Filtered	107.111	Filtered	Filtered
CL1399.Contig2_All	S	399	217.955	248.684	211.125	309.118
CL140.Contig1_All	S	22	2097.59	1962.72	1791.38	1572.81
Unigene13942_All	S	22	2097.59	1962.72	1791.38	1572.81
CL1400.Contig1_All	S	49	54.7718	53.2709	Filtered	14.3667
CL1402.Contig2_All	S	205	10308.5	6978.59	11109.6	11550.9
CL1402.Contig3_All	S	77	10308.5	6978.59	11109.6	11550.9
CL1402.Contig2_All	S	496	366.313	343.885	317.282	724.005
CL1402.Contig3_All	S	368	366.313	343.885	317.282	724.005
CL1402.Contig2_All	S	160	Filtered	Filtered	Filtered	288.945
CL1402.Contig3_All	S	32	Filtered	Filtered	Filtered	288.945
CL1402.Contig2_All	T	161	125.075	Filtered	Filtered	Filtered
CL1402.Contig3_All	T	33	125.075	Filtered	Filtered	Filtered
CL1402.Contig2_All	S	494	Filtered	Filtered	26.4858	Filtered
CL1402.Contig3_All	S	366	Filtered	Filtered	26.4858	Filtered
CL1404.Contig1_All	S	288	46516.5	47187.2	47033.4	45033.6
CL1404.Contig1_All	S	295	433.915	714.71	931.485	395.193
CL1404.Contig1_All	S	288	835.139	714.71	931.485	395.193
CL1404.Contig1_All	Y	296	401.224	Filtered	Filtered	Filtered
CL1404.Contig1_All	S	295	1340.22	919.442	986.839	869.993
CL1404.Contig1_All	S	148	96.3763	Filtered	61.1533	Filtered
CL1404.Contig1_All	Y	150	Filtered	86.3845	Filtered	45.7084
CL1404.Contig3_All	S	301	20619.9	28847.4	23292.8	25328.1
CL1404.Contig3_All	S	337	24989.9	30437.7	26400.3	28634.5
CL1404.Contig3_All	S	280	2726.25	2992.81	5269.49	5713.12
CL1404.Contig3_All	S	296	2726.25	2992.81	5269.49	5713.12
CL1404.Contig3_All	Y	281	70.384	Filtered	181.084	Filtered
CL1404.Contig3_All	Y	297	70.384	Filtered	198.126	Filtered
CL1404.Contig3_All	S	182	1873.86	864.31	1013.33	1759.28
CL1404.Contig3_All	Y	180	Filtered	100.619	Filtered	Filtered
CL1404.Contig3_All	S	130	1745.53	1702	1407.01	1544.72
CL1404.Contig3_All	S	134	299.092	153.649	249.586	144.423
CL1404.Contig3_All	S	174	112.688	133.193	126.994	Filtered
CL1404.Contig3_All	S	319	2370.82	2735.5	1017.5	4717.67
CL1404.Contig3_All	S	134	21.6856	Filtered	Filtered	Filtered
CL1404.Contig3_All	S	130	21.6856	Filtered	Filtered	Filtered
CL1404.Contig3_All	S	196	460.372	464.03	315.761	353.898
CL1404.Contig3_All	S	201	80.5007	14.0578	17.601	Filtered
CL1404.Contig3_All	S	224	483.317	504.659	529.599	587.864
CL1404.Contig3_All	Y	150	Filtered	Filtered	Filtered	76.2299
CL1404.Contig3_All	S	148	Filtered	102.603	102.417	Filtered
CL1404.Contig3_All	S	156	45.2199	36.8171	31.818	29.7693
CL1404.Contig3_All	S	258	63.3564	Filtered	69.4619	66.886
CL1404.Contig3_All	Y	261	Filtered	34.8986	Filtered	Filtered
CL1404.Contig3_All	S	168	107.737	152.231	121.923	128.961
CL1404.Contig3_All	S	239	292.165	222.649	239.997	203.523
CL1404.Contig3_All	S	209	132.007	Filtered	89.8082	Filtered
CL1404.Contig3_All	Y	170	Filtered	Filtered	Filtered	29.2988
CL1404.Contig3_All	Y	327	Filtered	Filtered	Filtered	127.692
CL1404.Contig3_All	S	326	77.2612	59.3092	Filtered	50.4685
CL1404.Contig5_All	S	160	29245.5	25661.1	30796.3	32761.2
CL1404.Contig5_All	S	159	Filtered	15921.4	Filtered	16857.6
CL1404.Contig5_All	S	167	23.1233	40.7223	Filtered	41.7293
CL1404.Contig5_All	S	148	237.054	230.829	241.307	213.301
CL1405.Contig1_All	S	37	1359.71	243.836	1741.8	Filtered
CL1405.Contig1_All	S	34	1359.71	243.836	1741.8	Filtered
CL1405.Contig1_All	S	37	1042.56	1353.64	1225.63	894.995
CL1405.Contig1_All	M	33	923.969	1466.37	1433.86	1466.9
CL1405.Contig1_All	S	34	Filtered	544.377	Filtered	624.164
CL1405.Contig1_All	S	20	376.223	277.152	460.505	286.773
CL1405.Contig1_All	M	15	138.914	132.33	292.932	108.737
CL1409.Contig2_All	Y	259	9.06192	Filtered	Filtered	Filtered
CL1410.Contig1_All	C	15	2891.26	2675.2	2963.66	2726.13
CL1410.Contig1_All	T	8	2866.88	2657.87	2963.66	2726.13
CL1410.Contig3_All	C	15	2891.26	2675.2	2963.66	2726.13
CL1410.Contig3_All	T	8	2866.88	2657.87	2963.66	2726.13
CL1410.Contig5_All	C	15	2891.26	2675.2	2963.66	2726.13
CL1410.Contig5_All	T	8	2866.88	2657.87	2963.66	2726.13
CL1410.Contig1_All	S	20	24.3855	17.3299	Filtered	Filtered
CL1410.Contig3_All	S	20	24.3855	17.3299	Filtered	Filtered
CL1410.Contig5_All	S	20	24.3855	17.3299	Filtered	Filtered
CL1410.Contig1_All	M	87	33.2839	24.6654	47.8889	58.1852
CL1410.Contig3_All	M	87	33.2839	24.6654	47.8889	58.1852
CL1410.Contig5_All	M	87	33.2839	24.6654	47.8889	58.1852
CL1413.Contig1_All	S	432	253.395	227.439	217.491	125.692
CL1413.Contig3_All	S	438	253.395	227.439	217.491	125.692
CL1413.Contig1_All	S	212	155.594	134.586	168.075	161.203
CL1413.Contig3_All	S	218	155.594	134.586	168.075	161.203
CL1413.Contig1_All	M	211	54.7788	42.1808	62.4959	83.9091
CL1413.Contig3_All	M	217	54.7788	42.1808	62.4959	83.9091
CL1413.Contig1_All	T	290	159.322	136.056	141.496	122.349
CL1413.Contig1_All	C	285	159.322	136.056	141.496	122.349
CL1413.Contig3_All	T	296	159.322	136.056	141.496	122.349
CL1413.Contig3_All	C	291	159.322	136.056	141.496	122.349
CL1413.Contig1_All	T	321	81.9844	89.268	75.3286	Filtered
CL1413.Contig3_All	T	327	81.9844	89.268	75.3286	Filtered
CL1413.Contig1_All	S	446	Filtered	18.328	36.8975	Filtered
CL1413.Contig3_All	S	452	Filtered	18.328	36.8975	Filtered
CL1414.Contig1_All	S	92	1033.21	1085.85	500.009	503.675
CL1414.Contig1_All	C	470	226.126	146.891	10.8254	21.9293
CL1414.Contig1_All	S	476	Filtered	Filtered	10.8254	Filtered
CL1414.Contig1_All	S	475	26.7866	Filtered	Filtered	Filtered
CL1414.Contig1_All	S	413	119.449	Filtered	Filtered	44.6372
CL1414.Contig2_All	S	94	122.95	67.3326	39.4183	48.01
CL1415.Contig3_All	S	2	29.3179	24.9369	16.5449	11.0574
CL1420.Contig1_All	T	229	93.3401	73.6094	98.5503	Filtered
CL1420.Contig1_All	T	228	93.3401	73.6094	98.5503	Filtered
CL1420.Contig1_All	T	225	93.3401	73.6094	98.5503	Filtered
CL1420.Contig2_All	T	187	93.3401	73.6094	98.5503	Filtered
CL1420.Contig2_All	T	186	93.3401	73.6094	98.5503	Filtered
CL1420.Contig2_All	T	183	93.3401	73.6094	98.5503	Filtered
CL6467.Contig1_All	T	449	93.3401	73.6094	98.5503	Filtered
CL6467.Contig1_All	T	448	93.3401	73.6094	98.5503	Filtered
CL6467.Contig1_All	T	445	93.3401	73.6094	98.5503	Filtered
CL1422.Contig1_All	S	248	2631.91	1748.2	1704.07	1770.95
CL1422.Contig2_All	S	201	2631.91	1748.2	1704.07	1770.95
CL1422.Contig1_All	S	248	20.5398	31.6903	9.22018	20.0917
CL1422.Contig1_All	S	245	20.5398	31.6903	9.22018	20.0917
CL1422.Contig2_All	S	201	20.5398	31.6903	9.22018	20.0917
CL1422.Contig2_All	S	198	20.5398	31.6903	9.22018	20.0917
CL1422.Contig1_All	S	167	Filtered	Filtered	Filtered	48.3827
CL1422.Contig2_All	S	120	Filtered	Filtered	Filtered	48.3827
CL1422.Contig1_All	S	230	51.582	62.0155	22.842	27.8394
CL1422.Contig2_All	S	183	51.582	62.0155	22.842	27.8394
CL1423.Contig1_All	S	88	Filtered	1550.43	4052.3	3181.98
CL1423.Contig4_All	S	81	Filtered	1550.43	4052.3	3181.98
CL1423.Contig1_All	S	68	267.401	314.383	469.367	446.654
CL1423.Contig4_All	S	61	267.401	314.383	469.367	446.654
CL1423.Contig1_All	S	184	163.244	188.546	286.918	258.869
CL1423.Contig4_All	S	177	163.244	188.546	286.918	258.869
CL1423.Contig1_All	S	104	96.408	88.4428	166.284	Filtered
CL1423.Contig4_All	S	97	96.408	88.4428	166.284	Filtered
CL1425.Contig1_All	S	80	9678.29	1289.31	7441.08	6206.08
CL1425.Contig1_All	S	13	526.484	468.709	700.273	552.394
CL1425.Contig2_All	S	87	232.165	138.848	113.38	Filtered
Unigene11921_All	S	87	232.165	138.848	113.38	Filtered
Unigene15641_All	S	87	232.165	138.848	113.38	Filtered
CL1426.Contig1_All	S	122	34.244	19.417	14.2093	Filtered
CL1426.Contig2_All	S	102	34.244	19.417	14.2093	Filtered
CL1429.Contig5_All	S	465	3429.29	3706.22	1986.51	2219.6
CL1429.Contig5_All	S	30	130.778	169.278	81.4416	49.7754
CL1429.Contig5_All	S	528	Filtered	59.6224	Filtered	Filtered
CL1429.Contig5_All	S	479	Filtered	76.4398	86.4913	Filtered
CL1429.Contig5_All	M	11	54.9445	91.9391	Filtered	Filtered
CL1429.Contig5_All	S	10	85.4666	91.9391	Filtered	Filtered
CL143.Contig1_All	S	43	1680.64	1780.76	2162.87	Filtered
CL143.Contig2_All	S	43	1680.64	1780.76	2162.87	Filtered
CL143.Contig1_All	T	46	31.4732	229.521	Filtered	122.529
CL143.Contig2_All	T	46	31.4732	229.521	Filtered	122.529
CL1433.Contig1_All	T	336	Filtered	Filtered	545.895	Filtered
CL1433.Contig2_All	T	336	Filtered	Filtered	545.895	Filtered
CL1433.Contig1_All	S	337	Filtered	369.422	Filtered	598.014
CL1433.Contig2_All	S	337	Filtered	369.422	Filtered	598.014
CL1438.Contig3_All	S	325	674.595	597.471	242.802	342.741
CL1438.Contig3_All	S	327	75.95	47.2528	14.9603	34.2603
CL1438.Contig3_All	S	325	75.95	47.2528	14.9603	34.2603
CL1439.Contig1_All	T	881	7754.16	6365.39	10565	8608.23
CL1439.Contig5_All	T	881	7754.16	6365.39	10565	8608.23
CL1439.Contig1_All	S	899	757.461	Filtered	1653.93	1354.46
CL1439.Contig5_All	S	899	757.461	Filtered	1653.93	1354.46
CL1439.Contig1_All	T	948	1223.82	1272.2	2600.4	1837.41
CL1439.Contig5_All	T	948	1223.82	1272.2	2600.4	1837.41
CL1439.Contig1_All	S	904	52.2728	45.0318	154.802	112.334
CL1439.Contig5_All	S	904	52.2728	45.0318	154.802	112.334
CL1439.Contig1_All	S	2	196.238	Filtered	189.845	187.7
CL1439.Contig5_All	S	2	196.238	Filtered	189.845	187.7
CL1439.Contig1_All	T	540	Filtered	23.8491	57.5244	Filtered
CL1439.Contig5_All	T	540	Filtered	23.8491	57.5244	Filtered
CL1439.Contig1_All	S	544	Filtered	Filtered	28.971	Filtered
CL1439.Contig5_All	S	544	Filtered	Filtered	28.971	Filtered
CL1439.Contig1_All	S	931	18.1378	20.7821	21.023	15.2018
CL1439.Contig5_All	S	931	18.1378	20.7821	21.023	15.2018
CL1439.Contig8_All	T	947	126.947	Filtered	147.868	87.9448
CL1439.Contig8_All	S	890	Filtered	Filtered	Filtered	18.5152
CL1439.Contig8_All	S	888	32.0244	Filtered	Filtered	Filtered
CL1439.Contig8_All	T	881	Filtered	Filtered	13.6417	Filtered
CL144.Contig1_All	S	140	982.291	Filtered	1554.24	1837.22
CL144.Contig1_All	M	145	Filtered	Filtered	Filtered	412.918
CL1444.Contig2_All	S	96	2579.12	4209.16	2459.22	2089.2
CL1444.Contig2_All	S	71	Filtered	85.4375	Filtered	60.5358
CL1445.Contig1_All	S	473	Filtered	467.503	620.246	501.939
CL1445.Contig1_All	S	473	62.9198	Filtered	95.6818	37.6419
CL1445.Contig1_All	T	470	62.9198	Filtered	45.04	37.6419
CL1445.Contig1_All	T	474	Filtered	Filtered	50.6418	Filtered
CL1445.Contig1_All	S	303	Filtered	Filtered	Filtered	136.225
CL1445.Contig1_All	S	600	41.05	40.4208	40.7442	Filtered
CL1445.Contig1_All	S	602	Filtered	Filtered	22.3613	Filtered
CL1445.Contig1_All	S	611	20.9076	Filtered	Filtered	27.498
CL1445.Contig2_All	S	655	Filtered	Filtered	26.7901	Filtered
CL1445.Contig2_All	S	963	33.3345	36.7209	148.012	71.6523
CL1445.Contig2_All	S	954	19.855	Filtered	Filtered	Filtered
CL1448.Contig3_All	S	118	4369.59	4889.28	4310.81	5180.06
CL1449.Contig4_All	Y	856	Filtered	Filtered	Filtered	324.803
CL1450.Contig1_All	Y	193	39.7756	37.7213	Filtered	36.2748
CL1450.Contig1_All	T	191	39.7756	37.7213	Filtered	36.2748
CL1450.Contig2_All	Y	193	39.7756	37.7213	Filtered	36.2748
CL1450.Contig2_All	T	191	39.7756	37.7213	Filtered	36.2748
CL1450.Contig3_All	Y	193	39.7756	37.7213	Filtered	36.2748
CL1450.Contig3_All	T	191	39.7756	37.7213	Filtered	36.2748
CL1454.Contig1_All	S	11	62.6558	93.141	104.373	Filtered
CL1455.Contig1_All	S	76	889.548	826.628	1089.41	939.171
CL1456.Contig1_All	C	255	128.584	79.7732	101.192	66.968
CL1456.Contig3_All	C	261	128.584	79.7732	101.192	66.968
CL1457.Contig2_All	S	283	213.937	149.547	80.6684	219.089
CL1457.Contig2_All	M	291	30.527	83.2971	137.861	63.74
CL1457.Contig2_All	Y	287	19.3191	99.259	103.281	63.74
CL1458.Contig2_All	S	521	Filtered	Filtered	29.7963	Filtered
CL1458.Contig2_All	T	523	22.361	Filtered	Filtered	Filtered
CL1461.Contig1_All	S	576	331.109	267.453	334.611	338.95
CL1461.Contig3_All	S	551	331.109	267.453	334.611	338.95
CL1461.Contig4_All	S	547	331.109	267.453	334.611	338.95
CL1464.Contig2_All	S	47	17.8686	26.3894	22.0191	55.8839
CL1464.Contig3_All	S	532	17.8686	26.3894	22.0191	55.8839
CL1471.Contig2_All	S	122	5058.19	5092.09	3076.75	3668.2
CL1471.Contig2_All	S	215	123.453	84.3371	54.6765	50.5099
CL1471.Contig2_All	S	205	29.8054	16.6326	Filtered	7.88699
CL1477.Contig2_All	S	5	250.893	Filtered	Filtered	Filtered
CL1479.Contig3_All	C	551	11.0706	33.6212	26.9936	44.8669
CL1479.Contig3_All	C	544	11.0706	33.6212	26.9936	44.8669
CL1479.Contig3_All	C	543	11.0706	33.6212	26.9936	44.8669
CL1482.Contig1_All	S	938	2464.61	2009.41	1323.54	1432.14
CL1482.Contig1_All	S	935	1264.11	1167.54	1323.54	948.983
CL1482.Contig2_All	S	901	2464.61	2009.41	1323.54	1432.14
CL1482.Contig2_All	S	898	1264.11	1167.54	1323.54	948.983
CL1482.Contig1_All	S	938	1233.09	1458.39	1083.84	822.711
CL1482.Contig2_All	S	901	1233.09	1458.39	1083.84	822.711
CL1482.Contig1_All	T	942	1200.5	841.872	Filtered	483.153
CL1482.Contig2_All	T	905	1200.5	841.872	Filtered	483.153
CL1482.Contig1_All	T	942	149.241	21.5604	685.965	Filtered
CL1482.Contig1_All	S	938	149.241	21.5604	685.965	Filtered
CL1482.Contig1_All	S	935	149.241	21.5604	685.965	Filtered
CL1482.Contig2_All	T	905	149.241	21.5604	685.965	Filtered
CL1482.Contig2_All	S	901	149.241	21.5604	685.965	Filtered
CL1482.Contig2_All	S	898	149.241	21.5604	685.965	Filtered
CL1482.Contig1_All	S	61	7394.28	7268.97	4163.86	5066.88
CL1482.Contig2_All	S	61	7394.28	7268.97	4163.86	5066.88
CL1482.Contig1_All	S	201	Filtered	558.077	279.06	Filtered
CL1482.Contig2_All	S	201	Filtered	558.077	279.06	Filtered
CL1482.Contig1_All	S	201	488.239	553.712	164.149	387.91
CL1482.Contig1_All	S	191	488.239	553.712	164.149	387.91
CL1482.Contig2_All	S	201	488.239	553.712	164.149	387.91
CL1482.Contig2_All	S	191	488.239	553.712	164.149	387.91
CL1482.Contig1_All	S	176	94.8171	Filtered	86.6946	80.0372
CL1482.Contig1_All	S	175	94.8171	Filtered	86.6946	80.0372
CL1482.Contig2_All	S	176	94.8171	Filtered	86.6946	80.0372
CL1482.Contig2_All	S	175	94.8171	Filtered	86.6946	80.0372
CL1482.Contig1_All	S	601	36.1958	Filtered	60.2002	36.3481
CL1482.Contig2_All	S	564	36.1958	Filtered	60.2002	36.3481
CL1482.Contig1_All	S	191	14.0884	Filtered	Filtered	Filtered
CL1482.Contig2_All	S	191	14.0884	Filtered	Filtered	Filtered
CL1482.Contig1_All	S	97	Filtered	23.2644	Filtered	31.4918
CL1482.Contig2_All	S	97	Filtered	23.2644	Filtered	31.4918
CL1485.Contig1_All	S	94	369.364	Filtered	Filtered	334.537
CL2338.Contig2_All	S	94	369.364	Filtered	Filtered	334.537
Unigene11368_All	S	102	369.364	Filtered	Filtered	334.537
CL149.Contig1_All	S	354	49.4213	39.0214	24.2832	67.9988
CL149.Contig2_All	S	354	49.4213	39.0214	24.2832	67.9988
CL149.Contig4_All	S	351	49.4213	39.0214	24.2832	67.9988
CL149.Contig1_All	S	359	Filtered	Filtered	Filtered	11.731
CL149.Contig2_All	S	359	Filtered	Filtered	Filtered	11.731
CL149.Contig4_All	S	356	Filtered	Filtered	Filtered	11.731
CL1491.Contig2_All	S	579	206.836	Filtered	140.766	136.213
CL1492.Contig1_All	S	83	87.6567	106.819	101.026	110.612
CL1492.Contig1_All	C	76	87.6567	106.819	101.026	110.612
Unigene20019_All	S	83	87.6567	106.819	101.026	110.612
Unigene20019_All	C	76	87.6567	106.819	101.026	110.612
CL1493.Contig1_All	S	95	231.879	179.658	120.4	Filtered
CL1493.Contig2_All	S	32	231.879	179.658	120.4	Filtered
CL1497.Contig2_All	Y	293	Filtered	7.11109	6.3565	Filtered
CL1501.Contig3_All	S	80	18.2238	Filtered	Filtered	Filtered
CL1515.Contig1_All	S	73	86.6865	49.7905	60.8735	44.7027
CL1515.Contig2_All	S	73	86.6865	49.7905	60.8735	44.7027
CL1516.Contig1_All	S	41	466.392	437.872	523.035	441.286
CL1516.Contig1_All	M	39	127.266	130.021	140.856	134.444
CL1521.Contig1_All	S	1119	Filtered	22.0313	Filtered	Filtered
CL1521.Contig1_All	T	688	45.3279	51.4405	Filtered	Filtered
CL1521.Contig1_All	S	314	68.8033	45.9843	35.4043	44.08
CL1521.Contig1_All	S	681	21.827	24.2442	14.8796	6.97603
CL1522.Contig2_All	S	456	Filtered	Filtered	Filtered	54.9491
CL1523.Contig1_All	M	378	27.6119	20.177	26.6657	29.4736
CL1523.Contig1_All	S	83	27.5357	35.3018	Filtered	13.9453
CL1523.Contig1_All	S	105	26.6156	22.6421	20.6833	9.88163
CL1526.Contig1_All	T	349	401.393	339.749	202.372	252.757
CL1526.Contig1_All	C	347	419.482	344.127	221.865	252.757
CL1526.Contig2_All	T	349	401.393	339.749	202.372	252.757
CL1526.Contig2_All	C	347	419.482	344.127	221.865	252.757
Unigene17042_All	T	349	401.393	339.749	202.372	252.757
Unigene17042_All	C	347	419.482	344.127	221.865	252.757
CL1526.Contig1_All	C	118	293.944	227.275	51.9973	121.099
CL1526.Contig2_All	C	118	293.944	227.275	51.9973	121.099
Unigene17042_All	C	118	293.944	227.275	51.9973	121.099
CL1526.Contig1_All	C	376	44.5223	Filtered	Filtered	Filtered
CL1526.Contig2_All	C	376	44.5223	Filtered	Filtered	Filtered
Unigene17042_All	C	376	44.5223	Filtered	Filtered	Filtered
CL1527.Contig5_All	S	27	3174.1	2942.77	3903.97	3642.91
CL1527.Contig5_All	S	31	115.612	Filtered	Filtered	Filtered
CL1527.Contig5_All	S	27	Filtered	402.573	448.712	337.774
CL1527.Contig5_All	S	26	Filtered	402.573	448.712	337.774
CL153.Contig1_All	S	361	Filtered	Filtered	128.286	Filtered
CL153.Contig2_All	S	361	Filtered	Filtered	128.286	Filtered
CL153.Contig1_All	S	96	145.523	72.3706	84.1872	40.6927
CL153.Contig2_All	S	96	145.523	72.3706	84.1872	40.6927
CL153.Contig1_All	S	38	Filtered	Filtered	66.7508	58.676
CL153.Contig2_All	S	38	Filtered	Filtered	66.7508	58.676
CL1531.Contig2_All	S	420	Filtered	Filtered	1552.04	480.908
CL1531.Contig2_All	S	419	Filtered	Filtered	776.805	Filtered
CL1531.Contig3_All	S	420	Filtered	Filtered	1552.04	480.908
CL1531.Contig3_All	S	419	Filtered	Filtered	776.805	Filtered
CL1531.Contig2_All	S	417	Filtered	Filtered	775.236	480.908
CL1531.Contig3_All	S	417	Filtered	Filtered	775.236	480.908
CL1531.Contig2_All	S	420	Filtered	512.477	Filtered	Filtered
CL1531.Contig3_All	S	420	Filtered	512.477	Filtered	Filtered
CL1531.Contig2_All	S	419	Filtered	Filtered	439.759	434.564
CL1531.Contig3_All	S	419	Filtered	Filtered	439.759	434.564
CL1531.Contig2_All	S	72	Filtered	Filtered	31.7371	Filtered
CL1531.Contig2_All	C	61	Filtered	Filtered	31.7371	Filtered
CL1531.Contig3_All	S	72	Filtered	Filtered	31.7371	Filtered
CL1531.Contig3_All	C	61	Filtered	Filtered	31.7371	Filtered
CL1533.Contig1_All	S	46	8485.9	8406.05	8454.97	9070.31
CL1533.Contig1_All	S	42	8485.9	8406.05	8454.97	9070.31
CL1533.Contig2_All	S	46	8485.9	8406.05	8454.97	9070.31
CL1533.Contig2_All	S	42	8485.9	8406.05	8454.97	9070.31
CL1533.Contig1_All	M	39	3048.98	3328.87	3164.58	3238.16
CL1533.Contig2_All	M	39	3048.98	3328.87	3164.58	3238.16
CL1533.Contig1_All	S	42	Filtered	15.0967	Filtered	35.5983
CL1533.Contig2_All	S	42	Filtered	15.0967	Filtered	35.5983
CL1533.Contig1_All	C	27	54.4213	43.8968	31.9214	1
CL1533.Contig1_All	S	13	35.963	36.4789	Filtered	Filtered
CL1533.Contig2_All	C	27	54.4213	43.8968	31.9214	1
CL1533.Contig2_All	S	13	35.963	36.4789	Filtered	Filtered
CL1533.Contig1_All	S	17	Filtered	Filtered	31.9214	Filtered
CL1533.Contig2_All	S	17	Filtered	Filtered	31.9214	Filtered
CL1533.Contig1_All	S	28	18.4583	7.41793	Filtered	1
CL1533.Contig2_All	S	28	18.4583	7.41793	Filtered	1
CL1537.Contig1_All	S	134	3302.04	4185.84	3960.62	4919.92
CL1537.Contig1_All	S	132	3302.04	4185.84	3960.62	4919.92
CL1537.Contig2_All	S	167	3302.04	4185.84	3960.62	4919.92
CL1537.Contig2_All	S	165	3302.04	4185.84	3960.62	4919.92
CL1537.Contig1_All	T	164	3935.62	3838.37	4285.54	3977.19
CL1537.Contig2_All	T	197	3935.62	3838.37	4285.54	3977.19
CL1537.Contig1_All	Y	179	647.022	Filtered	538.39	598.428
CL1537.Contig1_All	S	173	647.022	Filtered	870.988	598.428
CL1537.Contig1_All	S	171	647.022	Filtered	870.988	598.428
CL1537.Contig2_All	Y	212	647.022	Filtered	538.39	598.428
CL1537.Contig2_All	S	206	647.022	Filtered	870.988	598.428
CL1537.Contig2_All	S	204	647.022	Filtered	870.988	598.428
CL1537.Contig1_All	S	181	Filtered	Filtered	332.599	Filtered
CL1537.Contig2_All	S	214	Filtered	Filtered	332.599	Filtered
CL1537.Contig1_All	S	173	67.6263	Filtered	Filtered	105.19
CL1537.Contig1_All	S	171	67.6263	Filtered	Filtered	105.19
CL1537.Contig2_All	S	206	67.6263	Filtered	Filtered	105.19
CL1537.Contig2_All	S	204	67.6263	Filtered	Filtered	105.19
CL1537.Contig1_All	S	155	270.027	255.449	428.293	533.249
CL1537.Contig1_All	S	153	270.027	255.449	428.293	533.249
CL1537.Contig2_All	S	188	270.027	255.449	428.293	533.249
CL1537.Contig2_All	S	186	270.027	255.449	428.293	533.249
CL1537.Contig1_All	S	126	134.878	61.9265	Filtered	Filtered
CL1537.Contig1_All	S	124	134.878	61.9265	Filtered	Filtered
CL1537.Contig1_All	S	122	134.878	61.9265	Filtered	Filtered
CL1537.Contig2_All	S	159	134.878	61.9265	Filtered	Filtered
CL1537.Contig2_All	S	157	134.878	61.9265	Filtered	Filtered
CL1537.Contig2_All	S	155	134.878	61.9265	Filtered	Filtered
CL1537.Contig1_All	T	216	81.2038	100.639	64.7524	67.7254
CL1537.Contig2_All	T	249	81.2038	100.639	64.7524	67.7254
CL1544.Contig1_All	S	118	534.148	530.331	591.482	599.469
CL1544.Contig2_All	S	126	534.148	530.331	591.482	599.469
CL1544.Contig3_All	S	118	534.148	530.331	591.482	599.469
CL1544.Contig4_All	S	118	534.148	530.331	591.482	599.469
CL1544.Contig5_All	S	126	534.148	530.331	591.482	599.469
CL1544.Contig6_All	S	126	534.148	530.331	591.482	599.469
CL1544.Contig7_All	S	126	534.148	530.331	591.482	599.469
CL1544.Contig8_All	S	118	534.148	530.331	591.482	599.469
CL1544.Contig1_All	S	76	278.242	381.03	383.964	377.147
CL1544.Contig2_All	S	84	278.242	381.03	383.964	377.147
CL1544.Contig3_All	S	76	278.242	381.03	383.964	377.147
CL1544.Contig4_All	S	76	278.242	381.03	383.964	377.147
CL1544.Contig5_All	S	84	278.242	381.03	383.964	377.147
CL1544.Contig6_All	S	84	278.242	381.03	383.964	377.147
CL1544.Contig7_All	S	84	278.242	381.03	383.964	377.147
CL1544.Contig8_All	S	76	278.242	381.03	383.964	377.147
CL1544.Contig1_All	T	567	Filtered	Filtered	Filtered	92.6527
CL1544.Contig2_All	T	575	Filtered	Filtered	Filtered	92.6527
CL1544.Contig3_All	T	567	Filtered	Filtered	Filtered	92.6527
CL1544.Contig4_All	T	567	Filtered	Filtered	Filtered	92.6527
CL1544.Contig5_All	T	575	Filtered	Filtered	Filtered	92.6527
CL1544.Contig6_All	T	575	Filtered	Filtered	Filtered	92.6527
CL1544.Contig7_All	T	575	Filtered	Filtered	Filtered	92.6527
CL1544.Contig8_All	T	567	Filtered	Filtered	Filtered	92.6527
CL1544.Contig1_All	S	565	Filtered	65.9316	Filtered	Filtered
CL1544.Contig2_All	S	573	Filtered	65.9316	Filtered	Filtered
CL1544.Contig3_All	S	565	Filtered	65.9316	Filtered	Filtered
CL1544.Contig4_All	S	565	Filtered	65.9316	Filtered	Filtered
CL1544.Contig5_All	S	573	Filtered	65.9316	Filtered	Filtered
CL1544.Contig6_All	S	573	Filtered	65.9316	Filtered	Filtered
CL1544.Contig7_All	S	573	Filtered	65.9316	Filtered	Filtered
CL1544.Contig8_All	S	565	Filtered	65.9316	Filtered	Filtered
CL1544.Contig1_All	T	763	Filtered	Filtered	53.244	48.9382
CL1544.Contig2_All	T	771	Filtered	Filtered	53.244	48.9382
CL1544.Contig3_All	T	763	Filtered	Filtered	53.244	48.9382
CL1544.Contig4_All	T	763	Filtered	Filtered	53.244	48.9382
CL1544.Contig5_All	T	771	Filtered	Filtered	53.244	48.9382
CL1544.Contig6_All	T	771	Filtered	Filtered	53.244	48.9382
CL1544.Contig7_All	T	771	Filtered	Filtered	53.244	48.9382
CL1544.Contig8_All	T	763	Filtered	Filtered	53.244	48.9382
CL1544.Contig1_All	S	692	15.0902	30.9841	Filtered	Filtered
CL1544.Contig2_All	S	700	15.0902	30.9841	Filtered	Filtered
CL1544.Contig3_All	S	692	15.0902	30.9841	Filtered	Filtered
CL1544.Contig4_All	S	692	15.0902	30.9841	Filtered	Filtered
CL1544.Contig5_All	S	700	15.0902	30.9841	Filtered	Filtered
CL1544.Contig6_All	S	700	15.0902	30.9841	Filtered	Filtered
CL1544.Contig7_All	S	700	15.0902	30.9841	Filtered	Filtered
CL1544.Contig8_All	S	692	15.0902	30.9841	Filtered	Filtered
CL1555.Contig1_All	C	59	97.6041	38.4612	60.1017	167.706
CL1555.Contig1_All	T	52	53.1894	38.4612	60.1017	167.706
CL1555.Contig1_All	S	45	44.4147	Filtered	Filtered	Filtered
CL1555.Contig1_All	M	46	53.1894	38.4612	60.1017	72.2908
CL1565.Contig1_All	S	92	39.7351	34.8689	30.8391	42.5683
CL1565.Contig2_All	S	92	39.7351	34.8689	30.8391	42.5683
CL1565.Contig3_All	S	92	39.7351	34.8689	30.8391	42.5683
CL1566.Contig2_All	S	74	99.9829	Filtered	331.067	164.087
CL1567.Contig1_All	S	262	413.143	423.419	467.293	453.571
CL1567.Contig2_All	S	262	413.143	423.419	467.293	453.571
CL1567.Contig3_All	S	262	413.143	423.419	467.293	453.571
CL1567.Contig4_All	S	262	413.143	423.419	467.293	453.571
CL1567.Contig1_All	Y	276	45.8004	Filtered	74.7615	76.0397
CL1567.Contig2_All	Y	276	45.8004	Filtered	74.7615	76.0397
CL1567.Contig3_All	Y	276	45.8004	Filtered	74.7615	76.0397
CL1567.Contig4_All	Y	276	45.8004	Filtered	74.7615	76.0397
CL1567.Contig1_All	S	290	Filtered	Filtered	41.5398	Filtered
CL1567.Contig2_All	S	290	Filtered	Filtered	41.5398	Filtered
CL1567.Contig3_All	S	290	Filtered	Filtered	41.5398	Filtered
CL1567.Contig4_All	S	290	Filtered	Filtered	41.5398	Filtered
CL157.Contig3_All	C	129	2.31634	17.5194	6.56318	152.137
CL1570.Contig1_All	S	138	Filtered	36.9768	Filtered	Filtered
CL1570.Contig2_All	S	138	Filtered	36.9768	Filtered	Filtered
CL1571.Contig1_All	S	30	303.269	385.322	236.471	280.418
CL1571.Contig2_All	S	30	303.269	385.322	236.471	280.418
CL1571.Contig1_All	S	11	101.681	Filtered	95.3568	97.4658
CL1571.Contig2_All	S	11	101.681	Filtered	95.3568	97.4658
CL1573.Contig2_All	S	145	47.1415	39.0285	Filtered	Filtered
CL1574.Contig2_All	S	2	127.778	132.014	Filtered	Filtered
CL1577.Contig2_All	S	4	142.879	137.175	82.2648	56.8281
CL1577.Contig3_All	S	4	142.879	137.175	82.2648	56.8281
CL1577.Contig8_All	S	4	142.879	137.175	82.2648	56.8281
CL1577.Contig9_All	S	4	142.879	137.175	82.2648	56.8281
CL1577.Contig2_All	S	146	95.0022	Filtered	Filtered	52.2374
CL1577.Contig3_All	S	146	95.0022	Filtered	Filtered	52.2374
CL1577.Contig8_All	S	146	95.0022	Filtered	Filtered	52.2374
CL1577.Contig9_All	S	146	95.0022	Filtered	Filtered	52.2374
CL1579.Contig3_All	S	150	817.53	973.868	800.251	839.338
CL1579.Contig3_All	S	148	718.364	138.72	641.469	44.3843
CL1579.Contig3_All	S	142	371.995	235.034	433.84	360.887
CL1579.Contig3_All	S	150	88.4366	Filtered	Filtered	Filtered
CL1579.Contig3_All	S	147	88.4366	Filtered	Filtered	Filtered
CL1579.Contig3_All	S	306	735.301	839.203	1235.17	1260.06
CL1579.Contig3_All	S	302	735.301	839.203	1235.17	1260.06
CL1579.Contig3_All	S	302	Filtered	Filtered	88.8486	Filtered
CL1579.Contig3_All	S	408	225.979	Filtered	295.288	418.748
CL1579.Contig3_All	S	407	Filtered	219.83	Filtered	Filtered
CL1579.Contig3_All	S	153	68.8031	Filtered	Filtered	Filtered
CL1579.Contig3_All	S	147	38.0442	37.9908	Filtered	15.6207
CL1579.Contig3_All	S	312	Filtered	59.2941	Filtered	Filtered
CL1584.Contig1_All	S	423	407.91	367.46	552.495	453.487
CL1584.Contig2_All	S	62	407.91	367.46	552.495	453.487
CL1586.Contig2_All	Y	180	73.1808	56.4646	Filtered	103.657
CL1586.Contig2_All	S	635	39.5592	33.5447	Filtered	Filtered
CL1586.Contig2_All	Y	643	Filtered	Filtered	27.4807	Filtered
CL1586.Contig2_All	S	648	43.5457	98.1288	52.2317	62.2835
CL1592.Contig1_All	S	160	16.8284	Filtered	24.8286	Filtered
CL1592.Contig1_All	C	159	16.8284	Filtered	24.8286	Filtered
CL1592.Contig2_All	S	59	16.8284	Filtered	24.8286	Filtered
CL1592.Contig2_All	C	58	16.8284	Filtered	24.8286	Filtered
CL1597.Contig2_All	S	737	1507.46	1302.79	653.799	843.626
CL1597.Contig2_All	S	746	489.855	412.91	466.239	398.27
CL1597.Contig2_All	S	746	467.083	442.899	185.155	248.457
CL1597.Contig2_All	S	737	467.083	442.899	185.155	248.457
CL1597.Contig2_All	S	14	522.302	348.587	218.717	Filtered
CL1597.Contig2_All	S	15	Filtered	76.4066	Filtered	Filtered
CL1597.Contig2_All	S	14	Filtered	76.4066	Filtered	Filtered
CL1597.Contig2_All	S	17	51.8117	27.4385	61.7242	54.7531
CL1597.Contig2_All	S	896	30.1275	15.1197	Filtered	78.6562
CL1597.Contig2_All	S	915	258.28	442.958	170.334	315.057
CL1597.Contig2_All	S	940	81.1712	113.259	25.4666	202.944
CL1597.Contig2_All	C	929	81.1712	148.032	144.657	202.944
CL1597.Contig2_All	S	930	Filtered	Filtered	119.19	Filtered
CL1597.Contig2_All	S	943	Filtered	34.773	Filtered	Filtered
CL1597.Contig2_All	S	34	Filtered	Filtered	15.0254	Filtered
CL1597.Contig2_All	C	30	Filtered	Filtered	15.0254	Filtered
CL160.Contig1_All	S	56	7121.22	8639.25	7067.25	6359.18
CL160.Contig1_All	S	54	7121.22	8639.25	7067.25	6359.18
CL160.Contig1_All	S	54	1244.53	1452.02	1344.15	1249.89
CL160.Contig1_All	S	56	3896.66	3375.55	2189.15	1971.1
CL160.Contig1_All	T	68	824.36	Filtered	Filtered	Filtered
CL160.Contig1_All	T	68	730.118	Filtered	416.676	531.895
CL160.Contig1_All	S	65	879.375	176.607	447.652	643.037
CL160.Contig1_All	T	68	201.464	Filtered	Filtered	156.139
CL160.Contig1_All	S	65	230.565	149.305	11.1046	174.687
CL160.Contig1_All	S	63	230.565	149.305	11.1046	105.844
CL160.Contig1_All	S	65	41.3325	818.424	648.902	663.358
CL160.Contig1_All	S	63	149.256	176.607	30.9762	111.142
CL160.Contig1_All	T	66	29.1006	149.305	11.1046	87.3894
CL160.Contig1_All	S	63	Filtered	Filtered	216.223	189.328
CL160.Contig1_All	S	7	320.238	1210.75	427.88	Filtered
CL160.Contig1_All	S	4	567.384	1353.04	600.682	Filtered
CL160.Contig1_All	M	8	731.902	Filtered	303.592	259.218
CL160.Contig1_All	S	7	171.92	170.326	413.111	118.862
CL160.Contig1_All	M	6	731.902	Filtered	303.592	259.218
CL160.Contig1_All	T	5	739.329	276.787	172.801	259.218
CL160.Contig1_All	S	2	492.182	760.953	Filtered	259.218
CL160.Contig1_All	M	6	508.613	447.724	Filtered	Filtered
CL160.Contig1_All	S	2	428.095	Filtered	Filtered	Filtered
CL160.Contig1_All	M	8	247.147	313.228	69.2672	Filtered
CL160.Contig1_All	S	37	319.373	461.002	22.1722	132.832
CL160.Contig1_All	S	43	Filtered	Filtered	174.736	Filtered
CL160.Contig1_All	S	35	Filtered	Filtered	Filtered	8.34901
CL1603.Contig1_All	S	966	Filtered	1676.58	Filtered	2773.69
CL1603.Contig1_All	T	969	827.364	670.323	1082.6	1258.26
CL1603.Contig1_All	M	959	827.364	670.323	1082.6	1258.26
CL1603.Contig1_All	S	61	20.486	19.3509	Filtered	22.9124
CL1603.Contig1_All	S	771	45.0205	Filtered	39.8452	Filtered
CL1603.Contig1_All	T	879	Filtered	Filtered	Filtered	42.2918
CL1604.Contig2_All	S	105	209.015	Filtered	884.083	Filtered
CL1604.Contig2_All	S	70	Filtered	483.171	424.164	545.062
CL1604.Contig2_All	S	69	453.218	Filtered	Filtered	Filtered
CL1604.Contig2_All	M	76	212.852	163.737	175.252	352.932
CL1604.Contig2_All	M	73	212.852	163.737	175.252	352.932
CL1604.Contig2_All	S	78	39.8199	40.877	45.1745	136.08
CL1604.Contig2_All	S	126	3873.71	Filtered	2952.89	Filtered
CL1611.Contig3_All	S	328	Filtered	188.594	Filtered	103.226
CL1611.Contig4_All	S	300	Filtered	188.594	Filtered	103.226
CL1611.Contig9_All	S	214	Filtered	188.594	Filtered	103.226
CL1614.Contig4_All	S	23	291.747	291.607	253.96	360.507
CL1614.Contig4_All	S	196	77.1356	Filtered	Filtered	159.063
CL1614.Contig4_All	S	197	Filtered	Filtered	81.4725	Filtered
CL1614.Contig4_All	M	186	77.1356	Filtered	Filtered	Filtered
CL1614.Contig4_All	S	100	161.998	184.891	84.5305	116.045
CL1614.Contig4_All	T	103	13.7264	Filtered	5.319	14.3854
CL1614.Contig4_All	S	422	60.597	56.5027	31.5197	Filtered
CL1615.Contig1_All	S	85	14434.9	14220.8	2657.37	25481.6
CL1615.Contig2_All	S	85	14434.9	14220.8	2657.37	25481.6
CL1615.Contig1_All	S	79	71.5188	61.3723	107.314	141.902
CL1615.Contig2_All	S	79	71.5188	61.3723	107.314	141.902
CL1615.Contig1_All	S	52	2697.52	3835.65	1751.37	2790.52
CL1615.Contig2_All	S	52	2697.52	3835.65	1751.37	2790.52
CL1615.Contig1_All	S	52	305.741	362.298	261.801	379.287
CL1615.Contig1_All	S	51	305.741	362.298	261.801	379.287
CL1615.Contig1_All	S	50	305.741	362.298	261.801	379.287
CL1615.Contig2_All	S	52	305.741	362.298	261.801	379.287
CL1615.Contig2_All	S	51	305.741	362.298	261.801	379.287
CL1615.Contig2_All	S	50	305.741	362.298	261.801	379.287
CL1615.Contig1_All	S	50	1803.88	2616.5	1196.7	1214.24
CL1615.Contig2_All	S	50	1803.88	2616.5	1196.7	1214.24
CL1615.Contig1_All	M	187	2381.76	3036.08	1543.47	3470.22
CL1615.Contig2_All	M	187	2381.76	3036.08	1543.47	3470.22
CL1615.Contig1_All	M	121	1207.85	1410.21	1796.62	2174.85
CL1615.Contig2_All	M	121	1207.85	1410.21	1796.62	2174.85
CL1615.Contig1_All	M	121	527.25	609.665	863.441	1141.27
CL1615.Contig1_All	M	113	527.25	609.665	863.441	1141.27
CL1615.Contig2_All	M	121	527.25	609.665	863.441	1141.27
CL1615.Contig2_All	M	113	527.25	609.665	863.441	1141.27
CL1615.Contig1_All	M	113	594.174	609.855	681.967	820.048
CL1615.Contig2_All	M	113	594.174	609.855	681.967	820.048
CL1615.Contig1_All	T	86	Filtered	2974.36	Filtered	Filtered
CL1615.Contig2_All	T	86	Filtered	2974.36	Filtered	Filtered
CL1615.Contig1_All	C	136	2388.93	2017.53	1560.36	2537.51
CL1615.Contig2_All	C	136	2388.93	2017.53	1560.36	2537.51
CL1616.Contig3_All	S	128	1518.41	1316.91	Filtered	982.975
CL1618.Contig1_All	S	163	1091.46	929.537	1140.01	1820.14
CL1618.Contig2_All	S	123	1091.46	929.537	1140.01	1820.14
CL1618.Contig3_All	S	123	1091.46	929.537	1140.01	1820.14
Unigene6193_All	S	163	1091.46	929.537	1140.01	1820.14
CL1619.Contig2_All	T	1566	1979.59	2362.16	2742.88	2947.42
CL1619.Contig2_All	M	1558	404.666	568.077	732.193	710.26
CL1619.Contig2_All	S	1564	Filtered	119.095	Filtered	78.1515
CL1619.Contig2_All	S	1492	618.493	1036.61	1430.2	1377.76
CL1619.Contig2_All	M	1487	285.923	372.982	459.132	429.124
CL1619.Contig2_All	M	1487	207.446	270.868	485.829	442.737
CL1619.Contig2_All	M	1484	207.446	270.868	485.829	442.737
CL1619.Contig2_All	M	1484	Filtered	276.913	388.78	343.578
CL1619.Contig2_All	S	1421	1306.99	1270.12	1102.47	721.549
CL1619.Contig2_All	S	1649	932.793	870.019	1092.54	1010.5
CL1619.Contig2_All	S	1648	932.793	870.019	1092.54	1010.5
CL1619.Contig2_All	S	1646	932.793	870.019	1092.54	1010.5
CL1619.Contig2_All	S	1174	71.0192	159.571	115.084	Filtered
CL1619.Contig2_All	S	138	Filtered	Filtered	Filtered	261.239
CL1619.Contig2_All	S	137	Filtered	165.035	Filtered	Filtered
CL1619.Contig2_All	S	140	164.671	Filtered	Filtered	Filtered
CL1619.Contig2_All	S	139	Filtered	Filtered	Filtered	104.69
CL1619.Contig2_All	S	1545	394.669	435.762	452.367	439.373
CL1619.Contig2_All	S	298	408.067	342.027	359.506	425.416
CL1619.Contig2_All	C	289	408.067	342.027	359.506	425.416
CL1619.Contig2_All	M	296	64.8947	73.1003	100.956	95.1769
CL1619.Contig2_All	S	994	283.496	250.075	225.745	213.389
CL1619.Contig2_All	C	671	219.279	184.601	178.729	147.605
CL1619.Contig2_All	S	669	219.279	184.601	178.729	147.605
CL1619.Contig2_All	S	152	Filtered	153.758	35.7141	Filtered
CL1619.Contig2_All	S	682	Filtered	28.0946	Filtered	Filtered
CL1619.Contig2_All	S	686	Filtered	Filtered	11.2849	Filtered
CL1619.Contig2_All	S	316	61.6843	57.1608	29.7502	35.5463
CL1619.Contig2_All	S	1528	23.6244	42.417	19.7929	Filtered
CL1623.Contig1_All	S	525	4815.47	2927.9	2850.81	2815.6
CL1623.Contig2_All	S	540	4815.47	2927.9	2850.81	2815.6
CL1623.Contig1_All	Y	523	1760.33	1767.8	2248.22	1661.06
CL1623.Contig1_All	M	519	3428.31	1767.8	2248.22	1661.06
CL1623.Contig2_All	Y	538	1760.33	1767.8	2248.22	1661.06
CL1623.Contig2_All	M	534	3428.31	1767.8	2248.22	1661.06
CL1623.Contig1_All	T	45	4979.41	8785.37	6422.93	7488.97
CL1623.Contig2_All	T	45	4979.41	8785.37	6422.93	7488.97
CL1623.Contig1_All	Y	399	Filtered	Filtered	Filtered	207.05
CL1623.Contig2_All	Y	414	Filtered	Filtered	Filtered	207.05
CL1623.Contig1_All	S	396	328.235	367.371	Filtered	Filtered
CL1623.Contig2_All	S	411	328.235	367.371	Filtered	Filtered
CL1623.Contig1_All	S	180	198.895	398.359	216.279	154.755
CL1623.Contig2_All	S	180	198.895	398.359	216.279	154.755
CL1623.Contig1_All	S	513	Filtered	Filtered	Filtered	6.26416
CL1623.Contig2_All	S	528	Filtered	Filtered	Filtered	6.26416
CL1629.Contig1_All	S	139	6927.31	8280.87	7667.77	9095.89
CL1629.Contig2_All	S	139	6927.31	8280.87	7667.77	9095.89
CL1629.Contig1_All	S	137	1113.89	1310.4	1320.7	1478.98
CL1629.Contig2_All	S	137	1113.89	1310.4	1320.7	1478.98
CL1629.Contig1_All	S	139	896.79	1121.45	1187.61	1378.82
CL1629.Contig1_All	S	137	896.79	1121.45	1187.61	1378.82
CL1629.Contig2_All	S	139	896.79	1121.45	1187.61	1378.82
CL1629.Contig2_All	S	137	896.79	1121.45	1187.61	1378.82
CL163.Contig1_All	M	80	86.9262	69.4953	71.8244	97.1403
CL2160.Contig1_All	M	148	86.9262	69.4953	71.8244	97.1403
CL2160.Contig2_All	M	148	86.9262	69.4953	71.8244	97.1403
CL2160.Contig3_All	M	148	86.9262	69.4953	71.8244	97.1403
CL3305.Contig2_All	M	134	86.9262	69.4953	71.8244	97.1403
CL3305.Contig3_All	M	134	86.9262	69.4953	71.8244	97.1403
Unigene5658_All	M	145	86.9262	69.4953	71.8244	97.1403
CL163.Contig1_All	M	56	9.38719	12.36	11.1342	11.8792
CL2160.Contig1_All	M	124	9.38719	12.36	11.1342	11.8792
CL2160.Contig2_All	M	124	9.38719	12.36	11.1342	11.8792
CL2160.Contig3_All	M	124	9.38719	12.36	11.1342	11.8792
CL3305.Contig2_All	M	110	9.38719	12.36	11.1342	11.8792
CL3305.Contig3_All	M	110	9.38719	12.36	11.1342	11.8792
Unigene5658_All	M	121	9.38719	12.36	11.1342	11.8792
CL163.Contig1_All	S	93	17.0519	35.4336	4.62665	10.526
CL2160.Contig1_All	S	161	17.0519	35.4336	4.62665	10.526
CL2160.Contig2_All	S	161	17.0519	35.4336	4.62665	10.526
CL2160.Contig3_All	S	161	17.0519	35.4336	4.62665	10.526
CL3305.Contig2_All	S	147	17.0519	35.4336	4.62665	10.526
CL3305.Contig3_All	S	147	17.0519	35.4336	4.62665	10.526
Unigene5658_All	S	158	17.0519	35.4336	4.62665	10.526
CL1630.Contig1_All	T	79	763.568	719.378	834.883	787.272
CL1630.Contig2_All	T	79	763.568	719.378	834.883	787.272
CL1635.Contig3_All	S	251	1166.54	1002.6	914.165	830.589
CL1637.Contig1_All	S	19	Filtered	126.772	150.421	167.437
CL1637.Contig2_All	S	335	Filtered	126.772	150.421	167.437
CL1637.Contig3_All	S	335	Filtered	126.772	150.421	167.437
CL1638.Contig6_All	S	660	38.0535	31.5307	26.7326	32.4342
CL1638.Contig7_All	S	1937	636.939	Filtered	46.0207	528.421
CL1638.Contig7_All	T	1930	Filtered	614.739	Filtered	Filtered
CL1638.Contig7_All	S	155	Filtered	408.478	Filtered	Filtered
CL1638.Contig7_All	S	152	Filtered	408.478	Filtered	Filtered
CL1638.Contig7_All	S	152	279.363	276.275	243.038	Filtered
CL1638.Contig7_All	S	131	415.075	337.452	311.746	336.935
CL1638.Contig7_All	S	1386	972.287	880.297	703.391	808.646
CL1638.Contig7_All	C	1379	972.287	880.297	703.391	808.646
CL1638.Contig7_All	M	1378	127.098	106.207	111.046	153.02
CL1638.Contig7_All	S	1301	Filtered	169.225	177.982	Filtered
CL1638.Contig7_All	S	331	10.824	Filtered	Filtered	Filtered
CL1638.Contig7_All	S	337	Filtered	14.6861	Filtered	Filtered
CL1645.Contig1_All	M	305	24.6815	22.8343	Filtered	Filtered
CL1645.Contig2_All	M	317	24.6815	22.8343	Filtered	Filtered
CL1645.Contig1_All	M	315	Filtered	Filtered	35.0292	30.8587
CL1645.Contig2_All	M	327	Filtered	Filtered	35.0292	30.8587
CL1649.Contig1_All	S	449	206.597	Filtered	Filtered	154.645
CL1649.Contig1_All	S	451	Filtered	Filtered	134.396	Filtered
CL1654.Contig4_All	S	475	Filtered	58.5159	Filtered	Filtered
CL1657.Contig1_All	S	3	87.1827	Filtered	Filtered	Filtered
CL166.Contig3_All	S	115	Filtered	Filtered	Filtered	278.002
CL1661.Contig1_All	S	16	357.409	214.382	177.691	Filtered
CL1661.Contig2_All	S	16	357.409	214.382	177.691	Filtered
CL1664.Contig1_All	T	69	1606.21	1867.3	1854.96	2301.45
CL1664.Contig1_All	T	62	1606.21	1867.3	1854.96	2301.45
CL1664.Contig1_All	M	55	315.528	456.959	458.826	518.318
CL1664.Contig1_All	T	69	Filtered	Filtered	Filtered	31.5289
CL1664.Contig1_All	T	142	92.5486	51.9623	153.66	116.176
CL1664.Contig1_All	T	144	57.9365	Filtered	100.935	16.042
CL1664.Contig2_All	T	69	3705.78	3721.63	4372.11	4768.52
CL1664.Contig2_All	T	62	3705.78	3721.63	4372.11	4768.52
CL1664.Contig2_All	S	81	Filtered	471.249	Filtered	Filtered
CL1664.Contig2_All	T	69	78.6597	539.166	141.002	113.39
CL1664.Contig2_All	T	62	78.6597	539.166	141.002	113.39
CL1664.Contig2_All	M	55	122.213	182.3	333.697	302.145
CL1664.Contig2_All	T	79	78.6597	67.917	141.002	113.39
CL1670.Contig1_All	S	460	185.508	139.751	134.201	110.262
CL1670.Contig2_All	S	460	185.508	139.751	134.201	110.262
CL1670.Contig1_All	T	443	Filtered	125.709	Filtered	220.793
CL1670.Contig2_All	T	443	Filtered	125.709	Filtered	220.793
CL1670.Contig1_All	T	442	Filtered	Filtered	191.472	Filtered
CL1670.Contig2_All	T	442	Filtered	Filtered	191.472	Filtered
CL1671.Contig1_All	S	184	Filtered	Filtered	162.21	136.184
CL1671.Contig1_All	S	186	Filtered	Filtered	Filtered	78.5003
CL1671.Contig1_All	C	48	41.8725	18.2061	26.6258	30.4744
CL1674.Contig1_All	S	102	Filtered	Filtered	Filtered	56.5928
CL1674.Contig2_All	S	102	Filtered	Filtered	Filtered	56.5928
CL1674.Contig3_All	S	102	Filtered	Filtered	Filtered	56.5928
CL1674.Contig4_All	S	102	Filtered	Filtered	Filtered	56.5928
CL1674.Contig5_All	S	102	Filtered	Filtered	Filtered	56.5928
CL1674.Contig1_All	S	100	Filtered	Filtered	55.9701	Filtered
CL1674.Contig2_All	S	100	Filtered	Filtered	55.9701	Filtered
CL1674.Contig3_All	S	100	Filtered	Filtered	55.9701	Filtered
CL1674.Contig4_All	S	100	Filtered	Filtered	55.9701	Filtered
CL1674.Contig5_All	S	100	Filtered	Filtered	55.9701	Filtered
CL1674.Contig1_All	S	104	Filtered	8.13222	Filtered	Filtered
CL1674.Contig2_All	S	104	Filtered	8.13222	Filtered	Filtered
CL1674.Contig3_All	S	104	Filtered	8.13222	Filtered	Filtered
CL1674.Contig4_All	S	104	Filtered	8.13222	Filtered	Filtered
CL1674.Contig5_All	S	104	Filtered	8.13222	Filtered	Filtered
CL1675.Contig1_All	S	366	249.721	178.346	200.631	151.977
CL1675.Contig1_All	C	361	249.721	178.346	200.631	151.977
CL1675.Contig2_All	S	364	249.721	178.346	200.631	151.977
CL1675.Contig2_All	C	359	249.721	178.346	200.631	151.977
CL1678.Contig1_All	S	1034	1078.91	1016.92	1510.55	1782.86
CL1678.Contig1_All	S	1032	1078.91	1016.92	1510.55	1782.86
CL1678.Contig2_All	S	1034	1078.91	1016.92	1510.55	1782.86
CL1678.Contig2_All	S	1032	1078.91	1016.92	1510.55	1782.86
CL1678.Contig1_All	S	1034	24.7219	Filtered	Filtered	14.1071
CL1678.Contig2_All	S	1034	24.7219	Filtered	Filtered	14.1071
CL1678.Contig1_All	S	1032	Filtered	5.64435	1	1
CL1678.Contig2_All	S	1032	Filtered	5.64435	1	1
CL1678.Contig1_All	S	477	74.2738	Filtered	Filtered	63.2963
CL1678.Contig2_All	S	477	74.2738	Filtered	Filtered	63.2963
CL1678.Contig1_All	T	481	Filtered	49.2156	55.4416	Filtered
CL1678.Contig2_All	T	481	Filtered	49.2156	55.4416	Filtered
CL1678.Contig1_All	S	475	Filtered	Filtered	69.9955	84.1475
CL1678.Contig2_All	S	475	Filtered	Filtered	69.9955	84.1475
CL1678.Contig1_All	T	603	14.2545	11.2251	16.9376	19.9467
CL1678.Contig2_All	T	603	14.2545	11.2251	16.9376	19.9467
CL1678.Contig1_All	S	487	Filtered	9.65063	6.87703	Filtered
CL1678.Contig2_All	S	487	Filtered	9.65063	6.87703	Filtered
CL1678.Contig1_All	T	1054	Filtered	Filtered	54.5076	Filtered
CL1678.Contig2_All	T	1054	Filtered	Filtered	54.5076	Filtered
CL1680.Contig1_All	S	228	600.013	576.421	533.43	419.109
CL1680.Contig2_All	S	228	600.013	576.421	533.43	419.109
CL1686.Contig2_All	S	367	Filtered	Filtered	Filtered	438.241
CL1686.Contig2_All	S	369	392.772	249.789	310.234	106.449
CL1686.Contig2_All	S	369	56.69	Filtered	40.4476	100.878
CL1686.Contig2_All	S	365	Filtered	Filtered	Filtered	39.3577
CL1686.Contig2_All	S	372	26.9377	Filtered	Filtered	61.5206
CL1686.Contig2_All	S	372	43.0096	36.8434	77.7558	Filtered
CL1686.Contig2_All	S	369	43.0096	36.8434	77.7558	Filtered
CL1686.Contig2_All	S	365	43.0096	36.8434	77.7558	Filtered
CL1686.Contig2_All	M	361	64.7733	Filtered	68.8452	Filtered
CL1686.Contig2_All	S	367	29.7523	Filtered	40.4476	Filtered
CL1686.Contig2_All	S	294	252.738	179.143	291.326	284.665
CL1686.Contig2_All	C	289	252.738	179.143	291.326	284.665
CL1686.Contig2_All	M	291	72.7556	55.3466	117.183	101.227
CL1686.Contig2_All	S	388	125.805	103.592	170.838	165.138
CL1686.Contig2_All	S	424	174.205	191.22	259.633	241.533
CL1686.Contig2_All	S	396	Filtered	Filtered	26.7076	Filtered
CL1686.Contig2_All	S	179	112.785	35.458	Filtered	Filtered
CL1686.Contig2_All	S	349	86.2352	15.9183	82.6121	40.6866
CL1686.Contig2_All	C	217	Filtered	Filtered	Filtered	23.6639
CL1686.Contig2_All	S	215	Filtered	Filtered	Filtered	23.6639
CL1686.Contig2_All	Y	251	Filtered	Filtered	Filtered	36.0124
CL1686.Contig2_All	S	252	12.9575	Filtered	Filtered	Filtered
CL1688.Contig1_All	S	32	36512.1	36793.7	42094.6	38767.8
CL1688.Contig3_All	S	32	36512.1	36793.7	42094.6	38767.8
CL169.Contig2_All	S	274	21.278	34.8233	81.1029	82.4664
CL1691.Contig1_All	S	193	573.952	724.058	2609.28	3048.57
CL1691.Contig1_All	S	191	573.952	724.058	2609.28	3048.57
CL1691.Contig1_All	S	189	573.952	724.058	2609.28	3048.57
CL1691.Contig2_All	S	193	573.952	724.058	2609.28	3048.57
CL1691.Contig2_All	S	191	573.952	724.058	2609.28	3048.57
CL1691.Contig2_All	S	189	573.952	724.058	2609.28	3048.57
CL1691.Contig1_All	S	193	235.255	214.408	1167.56	1128.85
CL1691.Contig1_All	S	191	294.79	214.408	1335.93	1273.15
CL1691.Contig2_All	S	193	235.255	214.408	1167.56	1128.85
CL1691.Contig2_All	S	191	294.79	214.408	1335.93	1273.15
CL1691.Contig1_All	S	189	59.5351	Filtered	168.368	144.301
CL1691.Contig2_All	S	189	59.5351	Filtered	168.368	144.301
CL1691.Contig1_All	S	227	111.263	69.0841	256.983	201.094
CL1691.Contig1_All	S	225	111.263	69.0841	256.983	201.094
CL1691.Contig1_All	T	221	111.263	69.0841	256.983	201.094
CL1691.Contig1_All	S	219	111.263	69.0841	256.983	201.094
CL1691.Contig2_All	S	227	111.263	69.0841	256.983	201.094
CL1691.Contig2_All	S	225	111.263	69.0841	256.983	201.094
CL1691.Contig2_All	T	221	111.263	69.0841	256.983	201.094
CL1691.Contig2_All	S	219	111.263	69.0841	256.983	201.094
CL1691.Contig1_All	S	89	Filtered	Filtered	26.0451	Filtered
CL1691.Contig2_All	S	89	Filtered	Filtered	26.0451	Filtered
CL1692.Contig1_All	S	330	2995.12	2756.15	2234.03	2560.07
CL1695.Contig2_All	S	500	Filtered	147.535	Filtered	Filtered
CL1695.Contig2_All	S	66	Filtered	30.481	Filtered	Filtered
CL17.Contig1_All	S	303	184.148	Filtered	Filtered	86.9167
CL17.Contig3_All	S	303	184.148	Filtered	Filtered	86.9167
CL17.Contig1_All	M	164	39.5845	39.7677	24.8515	35.5675
CL17.Contig3_All	M	164	39.5845	39.7677	24.8515	35.5675
CL17.Contig1_All	S	310	Filtered	Filtered	34.0091	22.0915
CL17.Contig3_All	S	310	Filtered	Filtered	34.0091	22.0915
CL17.Contig2_All	S	224	429.122	541.939	870.363	1068.61
CL170.Contig2_All	S	514	31.0354	44.0014	46.8524	126.884
CL1708.Contig2_All	M	36	82.1135	87.843	51.8916	80.931
CL1708.Contig4_All	S	240	5277.58	5220.4	3164.09	3553.35
CL1708.Contig5_All	S	240	5277.58	5220.4	3164.09	3553.35
CL171.Contig3_All	Y	152	Filtered	24.3128	Filtered	33.1421
CL171.Contig3_All	M	554	57.099	48.4265	62.3368	104.586
CL171.Contig3_All	T	424	Filtered	25.0225	Filtered	Filtered
CL1710.Contig1_All	S	41	289.742	332.564	362.452	391.934
CL1710.Contig1_All	S	290	48.1781	Filtered	37.2114	Filtered
CL1710.Contig1_All	S	288	Filtered	118.009	93.0764	Filtered
CL1714.Contig1_All	T	166	3382.99	1343.4	1829.02	3896.67
CL1714.Contig3_All	T	166	3382.99	1343.4	1829.02	3896.67
CL1714.Contig1_All	C	97	122.415	74.2424	78.8991	120.77
CL1714.Contig3_All	C	97	122.415	74.2424	78.8991	120.77
CL1714.Contig1_All	S	36	21.2085	40.5818	14.4121	Filtered
CL1714.Contig3_All	S	36	21.2085	40.5818	14.4121	Filtered
CL1715.Contig1_All	S	208	1733.62	1716.14	2758.65	3275.45
CL1715.Contig1_All	S	206	1733.62	1716.14	2758.65	3275.45
CL1715.Contig1_All	S	204	1733.62	1384.14	2758.65	2820.7
CL1715.Contig1_All	S	202	1527.14	1716.14	2758.65	3167.59
CL1715.Contig2_All	S	208	1733.62	1716.14	2758.65	3275.45
CL1715.Contig2_All	S	206	1733.62	1716.14	2758.65	3275.45
CL1715.Contig2_All	S	204	1733.62	1384.14	2758.65	2820.7
CL1715.Contig2_All	S	202	1527.14	1716.14	2758.65	3167.59
CL1715.Contig1_All	S	271	1590.55	1531.83	1664.23	1340.02
CL1715.Contig1_All	S	262	1590.55	1531.83	1664.23	1340.02
CL1715.Contig2_All	S	277	1590.55	1531.83	1664.23	1340.02
CL1715.Contig2_All	S	268	1590.55	1531.83	1664.23	1340.02
CL1715.Contig1_All	C	162	36.7168	33.7385	26.3454	53.1559
CL1715.Contig2_All	C	162	36.7168	33.7385	26.3454	53.1559
CL1715.Contig1_All	S	244	1253.3	Filtered	Filtered	Filtered
CL1715.Contig2_All	S	244	1253.3	Filtered	Filtered	Filtered
CL1716.Contig1_All	M	171	12.3752	9.65863	32.245	85.2176
CL1716.Contig1_All	T	176	15.0601	Filtered	34.4058	Filtered
CL1716.Contig1_All	M	116	111.593	63.6665	271.192	275.866
CL1716.Contig1_All	C	55	230.635	146.851	182.713	247.976
CL1716.Contig1_All	M	63	38.1385	29.2368	40.858	61.3445
CL1716.Contig2_All	M	115	39.7348	31.8548	78.3024	72.1704
CL1721.Contig2_All	S	65	162.471	160.362	374.295	406.989
CL1721.Contig2_All	S	61	56.538	Filtered	Filtered	Filtered
CL1721.Contig2_All	S	62	Filtered	Filtered	Filtered	53.5353
CL1721.Contig2_All	S	33	Filtered	Filtered	209.853	214.582
CL1721.Contig2_All	S	40	57.6989	82.764	137.873	121.596
CL1721.Contig2_All	S	124	Filtered	Filtered	33.4212	Filtered
CL1721.Contig2_All	Y	132	Filtered	Filtered	33.3762	Filtered
CL1721.Contig2_All	S	105	3.85433	14.8509	Filtered	18.1885
CL1721.Contig2_All	S	104	3.85433	14.8509	Filtered	18.1885
CL1726.Contig2_All	S	614	93.0298	85.828	102.372	86.7342
CL1726.Contig3_All	S	847	93.0298	85.828	102.372	86.7342
Unigene12480_All	S	869	93.0298	85.828	102.372	86.7342
Unigene6861_All	S	614	93.0298	85.828	102.372	86.7342
CL1726.Contig2_All	S	584	37.4473	43.4827	25.6388	44.4819
CL1726.Contig3_All	S	817	37.4473	43.4827	25.6388	44.4819
Unigene12480_All	S	839	37.4473	43.4827	25.6388	44.4819
Unigene6861_All	S	584	37.4473	43.4827	25.6388	44.4819
CL1729.Contig1_All	S	76	59.0522	73.4524	Filtered	Filtered
CL1729.Contig5_All	S	76	59.0522	73.4524	Filtered	Filtered
CL1729.Contig6_All	S	76	59.0522	73.4524	Filtered	Filtered
CL1729.Contig2_All	T	109	179.86	Filtered	Filtered	Filtered
CL1732.Contig1_All	S	139	204.411	126.398	253.209	214.09
CL1732.Contig3_All	S	144	204.411	126.398	253.209	214.09
CL1732.Contig5_All	S	140	204.411	126.398	253.209	214.09
CL1732.Contig1_All	S	205	92.149	63.3143	86.4598	70.6702
CL1732.Contig3_All	S	210	92.149	63.3143	86.4598	70.6702
CL1732.Contig5_All	S	206	92.149	63.3143	86.4598	70.6702
CL1732.Contig1_All	S	164	Filtered	23.7299	33.4103	Filtered
CL1732.Contig3_All	S	169	Filtered	23.7299	33.4103	Filtered
CL1732.Contig5_All	S	165	Filtered	23.7299	33.4103	Filtered
CL1732.Contig4_All	S	36	112.67	107.367	146.794	121.993
CL1732.Contig4_All	S	35	112.67	107.367	146.794	121.993
CL1732.Contig4_All	Y	46	Filtered	Filtered	12.8529	Filtered
CL1732.Contig4_All	S	126	Filtered	48.2222	Filtered	Filtered
CL1732.Contig4_All	S	103	27.3924	48.7415	72.9799	65.1886
CL1742.Contig3_All	M	13	390.696	350.043	1003.34	197.134
CL1742.Contig3_All	S	12	Filtered	Filtered	517.376	Filtered
CL1742.Contig3_All	M	11	390.696	350.043	1003.34	197.134
CL1742.Contig3_All	Y	7	390.696	350.043	485.966	197.134
CL1742.Contig3_All	S	16	47.0636	Filtered	Filtered	Filtered
CL1742.Contig3_All	Y	680	71.7468	44.1441	54.347	Filtered
CL1742.Contig3_All	C	156	51.0536	36.7544	32.9192	56.4665
CL1754.Contig1_All	S	2	572.094	553.794	644.884	473.784
CL1754.Contig2_All	S	2	572.094	553.794	644.884	473.784
CL842.Contig1_All	S	2	572.094	553.794	644.884	473.784
CL842.Contig2_All	S	2	572.094	553.794	644.884	473.784
CL842.Contig3_All	S	2	572.094	553.794	644.884	473.784
CL842.Contig4_All	S	2	572.094	553.794	644.884	473.784
CL842.Contig5_All	S	2	572.094	553.794	644.884	473.784
CL842.Contig6_All	S	2	572.094	553.794	644.884	473.784
CL1759.Contig1_All	S	2	15590.2	14017.5	9688.36	29566.7
CL1759.Contig1_All	S	11	Filtered	Filtered	Filtered	133.464
CL1759.Contig1_All	S	10	829.245	4048.72	2554.15	3114.79
CL1759.Contig1_All	S	2	955.484	4048.72	2644.35	3192.64
CL1759.Contig1_All	S	11	126.239	Filtered	90.2026	77.8522
CL1759.Contig1_All	S	10	Filtered	Filtered	119.319	Filtered
CL1759.Contig1_All	M	1	52.2244	49.4939	24.7333	15.7064
CL1759.Contig1_All	C	150	456.625	1127.51	285.477	1083.15
CL1759.Contig1_All	M	144	34.3357	87.9168	36.4377	70.7664
CL1759.Contig1_All	M	141	34.3357	87.9168	36.4377	70.7664
CL1759.Contig1_All	C	39	61.3015	30.4353	18.1082	24.2755
CL1759.Contig1_All	C	80	22.4798	14.4875	17.1317	13.3141
CL1759.Contig2_All	S	2	16927.1	17749.8	13900.8	13616.4
CL1759.Contig2_All	S	10	2219.81	932.193	2149.2	245.593
CL1759.Contig2_All	S	2	2219.81	932.193	2149.2	245.593
CL1759.Contig2_All	M	1	Filtered	497.63	Filtered	Filtered
CL1769.Contig1_All	S	241	589.964	678.885	734.997	710.159
CL1769.Contig2_All	S	241	589.964	678.885	734.997	710.159
CL1769.Contig1_All	S	235	23.0429	36.9912	49.0246	91.1466
CL1769.Contig2_All	S	235	23.0429	36.9912	49.0246	91.1466
CL1769.Contig1_All	C	136	40.8061	37.0689	12.2318	22.1973
CL1769.Contig2_All	C	136	40.8061	37.0689	12.2318	22.1973
CL1781.Contig2_All	T	317	1292.78	1252.55	20.625	1280.9
CL1781.Contig2_All	M	688	467.396	570.334	556.745	583.01
CL1781.Contig2_All	S	690	Filtered	102.275	92.1945	Filtered
CL1782.Contig1_All	S	41	9508.88	11690	17225.4	12425.6
CL1782.Contig1_All	S	38	9508.88	11690	17225.4	12425.6
CL6559.Contig1_All	S	281	9508.88	11690	17225.4	12425.6
CL6559.Contig1_All	S	278	9508.88	11690	17225.4	12425.6
CL6559.Contig2_All	S	281	9508.88	11690	17225.4	12425.6
CL6559.Contig2_All	S	278	9508.88	11690	17225.4	12425.6
CL6559.Contig4_All	S	281	9508.88	11690	17225.4	12425.6
CL6559.Contig4_All	S	278	9508.88	11690	17225.4	12425.6
CL6559.Contig6_All	S	281	9508.88	11690	17225.4	12425.6
CL6559.Contig6_All	S	278	9508.88	11690	17225.4	12425.6
Unigene23136_All	S	104	9508.88	11690	17225.4	12425.6
Unigene23136_All	S	101	9508.88	11690	17225.4	12425.6
CL1783.Contig1_All	S	34	541.849	484.563	479.936	Filtered
CL1785.Contig1_All	M	181	Filtered	863.067	Filtered	Filtered
CL1785.Contig1_All	S	62	Filtered	57.6179	Filtered	Filtered
CL1791.Contig1_All	S	656	Filtered	35.703	Filtered	10.6901
CL1791.Contig1_All	S	653	250.718	1730.58	249.881	1244.7
CL1791.Contig1_All	S	330	2685.23	3066.61	2511.39	2830.37
CL1791.Contig1_All	S	656	1239.32	1244	1206.61	1247.58
CL1791.Contig1_All	S	653	1239.32	1244	1206.61	1247.58
CL1791.Contig1_All	S	681	330.153	141.563	191.236	132.231
CL1791.Contig1_All	S	129	303.802	233.987	230.811	315.011
CL1791.Contig1_All	T	121	Filtered	Filtered	50.8761	75.8696
CL1791.Contig1_All	T	126	61.511	Filtered	Filtered	59.9618
CL1791.Contig1_All	T	341	195.522	Filtered	Filtered	261.574
CL1791.Contig1_All	S	365	51.7516	Filtered	47.6807	56.1813
CL1791.Contig1_All	S	539	103.731	108.04	88.5179	54.4009
CL1791.Contig1_All	S	535	103.731	108.04	88.5179	54.4009
CL1791.Contig1_All	S	299	108.92	85.3402	99.9639	19.2594
CL1791.Contig1_All	S	675	46.8844	Filtered	Filtered	Filtered
CL1791.Contig1_All	S	596	30.5119	38.6786	46.4445	18.5111
CL1791.Contig1_All	S	592	30.5119	38.6786	46.4445	18.5111
CL1791.Contig1_All	M	749	7.23733	5.05752	6.23545	9.33949
CL1792.Contig1_All	S	27	Filtered	225.439	Filtered	149.81
CL1796.Contig1_All	T	72	Filtered	20.0513	40.2058	33.6552
CL1796.Contig6_All	T	72	Filtered	20.0513	40.2058	33.6552
CL1796.Contig7_All	T	73	Filtered	20.0513	40.2058	33.6552
CL1796.Contig1_All	T	244	43.1587	Filtered	Filtered	43.3649
CL1796.Contig6_All	T	244	43.1587	Filtered	Filtered	43.3649
CL1796.Contig7_All	T	245	43.1587	Filtered	Filtered	43.3649
CL1796.Contig1_All	S	211	35.318	Filtered	30.5052	42.5244
CL1796.Contig6_All	S	211	35.318	Filtered	30.5052	42.5244
CL1796.Contig7_All	S	212	35.318	Filtered	30.5052	42.5244
CL1796.Contig1_All	S	129	Filtered	31.2343	29.0916	54.3439
CL1796.Contig6_All	S	129	Filtered	31.2343	29.0916	54.3439
CL1796.Contig7_All	S	130	Filtered	31.2343	29.0916	54.3439
CL1796.Contig1_All	S	135	Filtered	10.0255	26.0613	14.993
CL1796.Contig6_All	S	135	Filtered	10.0255	26.0613	14.993
CL1796.Contig7_All	S	136	Filtered	10.0255	26.0613	14.993
CL1802.Contig1_All	S	181	90.7841	104.353	105.129	127.02
CL1802.Contig2_All	S	181	90.7841	104.353	105.129	127.02
CL1803.Contig1_All	S	19	81.9095	62.6966	23.0322	Filtered
CL1803.Contig2_All	S	19	81.9095	62.6966	23.0322	Filtered
CL3117.Contig1_All	S	19	81.9095	62.6966	23.0322	Filtered
Unigene7066_All	S	19	81.9095	62.6966	23.0322	Filtered
CL1804.Contig1_All	S	1488	4286.21	4580.41	4292.46	5149.51
CL1804.Contig1_All	T	2193	Filtered	1004.03	916.418	Filtered
CL1804.Contig1_All	T	852	Filtered	303.157	Filtered	248.344
CL1804.Contig1_All	S	1301	Filtered	68.581	201.788	172.879
CL1804.Contig1_All	S	1687	44.5695	54.9462	Filtered	Filtered
CL1804.Contig1_All	C	1685	44.5695	54.9462	Filtered	Filtered
CL1804.Contig1_All	S	662	112.786	138.841	105.795	94.0653
CL1804.Contig1_All	S	355	Filtered	Filtered	36.6862	Filtered
CL1806.Contig1_All	S	12	47.7955	Filtered	71.5583	Filtered
CL1806.Contig2_All	S	9	47.7955	Filtered	71.5583	Filtered
CL1806.Contig1_All	C	620	52.2094	26.967	Filtered	62.7136
CL1806.Contig1_All	S	616	52.2094	26.967	Filtered	62.7136
CL1806.Contig2_All	C	617	52.2094	26.967	Filtered	62.7136
CL1806.Contig2_All	S	613	52.2094	26.967	Filtered	62.7136
CL1806.Contig1_All	S	129	Filtered	Filtered	Filtered	45.569
CL1806.Contig2_All	S	126	Filtered	Filtered	Filtered	45.569
CL1811.Contig4_All	S	213	1380.34	1301.02	Filtered	Filtered
CL1811.Contig4_All	T	214	Filtered	Filtered	Filtered	1501.71
CL1811.Contig4_All	S	20	284.026	358.252	519.949	397.316
CL1811.Contig4_All	S	35	160.994	131.63	193.913	115.607
CL1812.Contig1_All	C	122	220.047	176.151	102.858	112.614
CL1812.Contig2_All	C	122	220.047	176.151	102.858	112.614
Unigene20617_All	C	54	220.047	176.151	102.858	112.614
CL1812.Contig1_All	S	151	53.6299	59.7783	66.6316	Filtered
CL1812.Contig2_All	S	151	53.6299	59.7783	66.6316	Filtered
Unigene20617_All	S	83	53.6299	59.7783	66.6316	Filtered
CL1814.Contig1_All	M	207	96.8173	159.745	107.29	208.016
CL1814.Contig1_All	M	206	96.8173	159.745	107.29	208.016
CL1814.Contig1_All	M	206	Filtered	36.2063	Filtered	Filtered
CL1814.Contig1_All	M	207	Filtered	Filtered	Filtered	41.4327
CL1824.Contig1_All	S	398	3763.53	3839.13	752.149	746.215
CL1824.Contig2_All	S	369	3763.53	3839.13	752.149	746.215
CL1824.Contig1_All	S	396	Filtered	Filtered	4026	3576.65
CL1824.Contig2_All	S	367	Filtered	Filtered	4026	3576.65
CL1824.Contig1_All	S	398	Filtered	363.591	Filtered	340.461
CL1824.Contig1_All	S	396	Filtered	363.591	Filtered	340.461
CL1824.Contig2_All	S	369	Filtered	363.591	Filtered	340.461
CL1824.Contig2_All	S	367	Filtered	363.591	Filtered	340.461
CL1824.Contig1_All	S	279	4153.1	4057.59	4660.02	4483.31
CL1824.Contig1_All	S	275	4153.1	4057.59	4660.02	4483.31
CL1824.Contig2_All	S	250	4153.1	4057.59	4660.02	4483.31
CL1824.Contig2_All	S	246	4153.1	4057.59	4660.02	4483.31
CL1824.Contig1_All	S	275	152.53	141.875	519.231	453.784
CL1824.Contig2_All	S	246	152.53	141.875	519.231	453.784
CL1824.Contig1_All	S	414	542.031	505.777	420.634	296.159
CL1824.Contig1_All	T	412	542.031	505.777	420.634	296.159
CL1824.Contig2_All	S	385	542.031	505.777	420.634	296.159
CL1824.Contig2_All	T	383	542.031	505.777	420.634	296.159
CL1824.Contig1_All	T	412	78.2566	69.0218	120.555	122.444
CL1824.Contig2_All	T	383	78.2566	69.0218	120.555	122.444
CL1824.Contig1_All	M	406	121.597	175.251	146.408	144.686
CL1824.Contig2_All	M	377	121.597	175.251	146.408	144.686
CL1824.Contig1_All	S	414	41.8378	32.8954	21.3743	27.3969
CL1824.Contig1_All	T	412	41.8378	32.8954	21.3743	27.3969
CL1824.Contig1_All	T	408	41.8378	32.8954	21.3743	27.3969
CL1824.Contig2_All	S	385	41.8378	32.8954	21.3743	27.3969
CL1824.Contig2_All	T	383	41.8378	32.8954	21.3743	27.3969
CL1824.Contig2_All	T	379	41.8378	32.8954	21.3743	27.3969
CL1824.Contig1_All	S	414	Filtered	19.9783	Filtered	Filtered
CL1824.Contig2_All	S	385	Filtered	19.9783	Filtered	Filtered
CL1824.Contig1_All	S	5	Filtered	23.7904	25.3097	25.551
CL1824.Contig2_All	S	5	Filtered	23.7904	25.3097	25.551
CL1825.Contig1_All	S	347	3831.94	4172.02	4301.68	5220.82
CL1825.Contig1_All	S	346	3831.94	4172.02	4301.68	5220.82
CL1825.Contig2_All	S	253	3831.94	4172.02	4301.68	5220.82
CL1825.Contig2_All	S	252	3831.94	4172.02	4301.68	5220.82
CL1825.Contig1_All	S	481	Filtered	Filtered	Filtered	9.71785
CL1825.Contig2_All	S	387	Filtered	Filtered	Filtered	9.71785
CL1830.Contig1_All	S	450	Filtered	Filtered	Filtered	61.5647
CL1831.Contig2_All	S	344	88.5874	130.554	114.965	128.724
CL1831.Contig2_All	T	305	78.231	71.8195	95.8402	121.012
CL1831.Contig2_All	S	587	193.697	330.296	286.474	330.554
CL1831.Contig2_All	S	456	29.2056	19.9242	29.7892	29.3171
CL1831.Contig2_All	S	239	Filtered	Filtered	Filtered	20.7019
CL1831.Contig2_All	S	240	Filtered	10.3437	Filtered	Filtered
CL1831.Contig2_All	M	385	62.0057	33.4888	30.0363	63.1158
CL1831.Contig2_All	C	227	143.357	100.87	77.2625	142.994
CL1831.Contig2_All	M	200	53.4888	63.495	39.0308	63.2473
CL1831.Contig2_All	S	334	Filtered	Filtered	Filtered	84.9506
CL1831.Contig2_All	C	469	51.722	48.6936	66.8211	82.5191
CL1831.Contig2_All	S	579	66.8868	Filtered	35.6788	Filtered
CL1832.Contig1_All	S	383	1391.3	1497.96	1514.04	1392
CL1832.Contig2_All	S	383	1391.3	1497.96	1514.04	1392
CL1832.Contig3_All	S	383	1391.3	1497.96	1514.04	1392
CL1832.Contig1_All	S	394	23.7483	16.4482	29.4935	47.885
CL1832.Contig2_All	S	394	23.7483	16.4482	29.4935	47.885
CL1832.Contig3_All	S	394	23.7483	16.4482	29.4935	47.885
CL1832.Contig1_All	S	383	51.8371	62.199	38.8316	64.6467
CL1832.Contig1_All	S	381	51.8371	62.199	38.8316	64.6467
CL1832.Contig2_All	S	383	51.8371	62.199	38.8316	64.6467
CL1832.Contig2_All	S	381	51.8371	62.199	38.8316	64.6467
CL1832.Contig3_All	S	383	51.8371	62.199	38.8316	64.6467
CL1832.Contig3_All	S	381	51.8371	62.199	38.8316	64.6467
CL1832.Contig1_All	S	526	117.58	72.9185	79.9764	106.364
CL1832.Contig2_All	S	526	117.58	72.9185	79.9764	106.364
CL1832.Contig3_All	S	526	117.58	72.9185	79.9764	106.364
CL1832.Contig1_All	S	573	67.063	Filtered	83.6491	50.8893
CL1832.Contig2_All	S	573	67.063	Filtered	83.6491	50.8893
CL1832.Contig3_All	S	573	67.063	Filtered	83.6491	50.8893
CL1839.Contig2_All	S	194	502.347	574.511	974.116	1109.99
CL1839.Contig2_All	S	17	45.374	61.5687	88.8469	74.079
CL1839.Contig2_All	Y	226	8.24445	Filtered	Filtered	Filtered
CL1842.Contig1_All	C	211	31.6422	15.4669	Filtered	Filtered
CL1842.Contig2_All	C	211	31.6422	15.4669	Filtered	Filtered
CL1842.Contig3_All	C	211	31.6422	15.4669	Filtered	Filtered
CL1844.Contig1_All	S	44	968.726	885.895	54.5995	567.766
CL1844.Contig1_All	S	42	968.726	885.895	54.5995	567.766
CL1844.Contig1_All	S	364	Filtered	144.214	111.705	113.423
CL1844.Contig1_All	S	363	Filtered	144.214	111.705	113.423
[truncated: 19,090 more rows]
